# Supplementary material for: Coordinate-Based Network Mapping of Brain Structure in Major Depressive Disorder in Younger and Older Adults: A Systematic Review and Meta-Analysis
Source: Atypon-hosted journal article supplement (doi:10.1176/appi.ajp.2021.21010088), 2021-10-14
Supplement: appi.ajp.2021.21010088.ds001.pdf [file appi.ajp.2021.21010088.ds001.pdf]

## CONTENTS

### 1. Methods

- 1.1. Search strategy
- 1.2. Inclusion and exclusion criteria
- 1.3. Data extraction
- 1.4. Search terms
- 1.5. Coordinate-based network mapping methods

### 2. Results

- 2.1. ALE Results
- 2.2. Robustness analyses
  - 2.2.1. Inclusion of Yuan et al (1) in LLD studies does not affect the results
  - 2.2.2. Different age cut-offs for LLD (55 vs 60 years of age) do not affect the results
  - 2.2.3. Inclusion of studies reporting results in regions of interest in addition to studies reporting coordinates does not affect the results
- 2.3. Sensitivity analysis for antidepressant effects on network mapping

### 3. Discussion

- 3.1. Age and sex effects on study networks
- 3.2. Similarities and differences between ALE and network mapping results
- 3.3. Similarities and differences between morphometric similarity and functional connectivity network mapping results
- 3.4. Effects of age of onset of depression
- 3.5. Effects of medication
- 3.6. Methodological considerations

# 1. METHODS

## 1.1. Search Strategy

In separate searches of the PubMed database and the Web Of Science database covering publications in PubMed, MEDLINE, and Web of Science databases up until 27 October 2020, we screened for studies of cortical thickness or voxel-based morphometry differences in late-life depression and major depressive disorder. We did not restrict our search by date and screened the relevant articles to identify additional records. We used a regular search alongside MESH term searches in PubMed and also generated a data-driven set of search terms using the *litsearchr* package in RStudio (2). The precise search terms and dates are available in the Supplementary Information and more information on the meta-analytic protocol is available on Prospero (pre-registration ID: CRD42020187718). We also screened the references of pertinent review articles to identify studies that were potentially missed in the full search. Only articles in English were included.

## 1.2. Inclusion and Exclusion Criteria

We included studies that conducted a whole-brain analysis of structural differences between patients with a depression diagnosis (these were usually based on the Diagnostic Statistical Manual (DSM) or International Classification of Disorders (ICD) guidelines) and healthy controls using voxel-based-morphometry or surface-based analysis.

We focused on studies of MDD in adults aged 18 to 55 years old and on studies of late-life depression in elderly aged 55+ years old. In the studies analysed here, all but two LLD studies included participants who were on average over 60 years old. We include two late-life depression studies with an average age of 57 and 59 years since a reanalysis showed that exclusion of these studies from the LLD group did not impact the findings (Supplementary Information). One study (Yuan *et al.*, 2008) was conducted in remitted LLD, but since depression episodes were relatively recent as it was a late onset study, this study was included as an exception. Re-analyzing the data without this study did not affect the results. One study (Kumar *et al.*, 2014) was focusing on patients with minor depression, but was included since the participants showed moderate HDRS scores (8-14) and pronounced differences in cortical thickness.

Subthreshold depression studies or correlational studies of depressive symptoms were excluded. Quantitative ratings of depression symptoms were extracted from the Hamilton Depression Rating Scale (HDRS (3)), Montgomery Depression Rating Scale (MADRAS;(4)), and Center for Epidemiologic Studies Depression Scale (CES-D, (5)) where these were reported.

We include both medication-naïve and medicated participants. However, studies of patients with comorbid psychiatric conditions (such as panic disorder, psychosis, bipolar or borderline personality disorder) or severe medical conditions (such as stroke, cancer, traumatic brain injury or neurodegenerative diseases) were excluded given that these conditions could independently affect brain structure. Overall quality of the studies based on the above criteria was assessed using a modified version of the Newcastle-Ottawa Scale ([http://www.ohri.ca/programs/clinical\\_epidemiology/oxford.asp](http://www.ohri.ca/programs/clinical_epidemiology/oxford.asp)), an established measure of study quality in meta-analyses (6). The Newcastle-Ottawa scale is the standard tool to assess quality of observational studies in systematic reviews and meta-analyses (7). It is also

recommended by the Cochrane Collaboration, as reported in the Cochrane Handbook, Chapter 13.5.2.3 (8), because the Newcastle-Ottawa scale contains only eight items and is simpler to apply.

Common methodological exclusion reasons were: 1) focus on regions of interest rather than the whole brain; 2) correlational analyses or lack of a control group; 3) studies that reported no differences between patients and control participants since coordinate-based network mapping currently can not synthesize null-results (9); 4) case reports and reviews or meta-analyses (e.g. ENIGMA-meta-analysis); 5) non grey matter focused studies, e.g. studies of magnetization transfer ratio, single-photon emission computed tomography, positron emission tomography, gyrfication and finally 6) studies that reported the results in a way that prevented the extraction of coordinates or a specific region of interest.

### **1.3. Data extraction**

A full list of articles included in this meta-analysis can be found in Table S4. PZ, JA, and GC then extracted relevant information: authors, publication year, sample size, demographics (current age, sex), clinical information (proportion of participants using an antidepressant, depression severity (mild, moderate, or severe, see Supplementary information for precise cut-offs), and age at onset of the first major depressive episode), modality (voxel-based or surface-based morphometry), and the coordinates of significant group differences for all studies that passed the full-text screening. Talairach coordinates were converted to MNI coordinates using an online conversion algorithm (<http://sprout022.sprout.yale.edu/mni2tal/mni2tal.html>) that implements a nonlinear transformation (10). Some studies did not report MNI or Talairach coordinates. Whenever a study included a visualisation of the anatomical location of the difference and the name of the specific region such as “right middle frontal gyrus”, “left hippocampus” or “rostral anterior cingulate cortex”, the Harvard-Oxford atlas was used to threshold the relevant anatomical region (>60) and the resulting region was included in the study-specific seed. This applied to only 23 of 141 studies and exclusion of these studies did not affect the results (Supplementary Information). Several studies were excluded since no region of interest could be reliably determined from the reported data. More information on the extracted demographics can be found in Supplementary Information. The following variables were extracted from the studies:

#### *Average Depression severity (based on HDRS and MADRAS)*

Every study was assigned a depression severity rating, and this was computed from the average reported HDRS and MADRS scores. Each depressed group was classified as mild, moderate or severe. The HDRS standard cut-off score: mild depression (8-16); moderate depression (17-23); and severe depression ( $\geq 24$ ). The MADRAS standard cut off scores: mild depression (7-19); moderate depression (20-34; and severe depression ( $>34$ ).

#### *Antidepressant medication*

In order to assess the impact of medication on our outcome measures, we computed the proportion of individuals per study who were on an antidepressant. Medication-naïve and medicated depression groups were included (both MDD and LLD). In studies with non medication-naïve participants, the percentage of participants on antidepressants at the time of the MRI scan was recorded. The most commonly reported antidepressant medications included

selective serotonin reuptake inhibitors, serotonin and norepinephrine reuptake inhibitors and tricyclic antidepressants. Among other less commonly reported medication was bupropion, a norepinephrine-dopamine reuptake inhibitor.

#### *Average age*

The average age of the MMD groups (and the control groups) was recorded in years.

#### *Sex ratio*

The ratio of females to total number of participants was recorded for each study and included as a covariate in downstream analysis.

#### *Early vs late onset LLD*

Late life depression studies were classified as either early onset, mixed or late onset. Five late onset studies reported age of onset of depression (average of 69 years), while two studies reported only including participants with age of onset greater than 50 (11) and 60 (12), respectively. Finally, another study classified as late onset (13) indicated that most depressed participants (12 of 16 patients) were never treated with antidepressants before. Two early onset studies reported the average onset age at 35 years of age. Mixed studies reported either a large range (20-60 years of age) in the age of onset or a proportion of patients with early and late onset.

#### *Years since onset of depression in MDD*

We used a continuous classification to determine years since onset of depression. In a case where ‘years since onset of depression’ was not reported, the average age was subtracted from the average age of depressive disorder onset.

#### *MMSE/MOCA score*

The average Mini Mental State Examination (MMSE) or Montreal Cognitive Assessment (MoCA) scores were recorded for participants from the LLD studies. All LLD studies reached the threshold for normal cognition (average score of 24 and 26 respectively). That is, we did not include studies where a comorbid diagnosis of mild cognitive impairment or Alzheimer’s might be determined.

### **1.4. Search terms**

Several searches were conducted to retrieve all relevant articles. The search terms and dates are summarized in Table S1. Articles reporting results from multivariate analyses such as support vector machines were also excluded to ensure consistency in the underlying univariate analyses of VBM and cortical thickness.

**TABLE S1A.** Details of initial literature searches conducted as part of the systematic meta-analysis

| Date of Search | Search Terms                                                                                                                                                                                                                                                                                                                                                                                                                                                                                                                                                                                                                                                                                                                                                                                                                                                                                                                                                                                                                                                                                                                                                                                                                                                                                                                                                                                                                                                                                                                                                                                                                               | Database                       | Number of Articles Retrieved | Duplicates detected | Type of Search            |
|----------------|--------------------------------------------------------------------------------------------------------------------------------------------------------------------------------------------------------------------------------------------------------------------------------------------------------------------------------------------------------------------------------------------------------------------------------------------------------------------------------------------------------------------------------------------------------------------------------------------------------------------------------------------------------------------------------------------------------------------------------------------------------------------------------------------------------------------------------------------------------------------------------------------------------------------------------------------------------------------------------------------------------------------------------------------------------------------------------------------------------------------------------------------------------------------------------------------------------------------------------------------------------------------------------------------------------------------------------------------------------------------------------------------------------------------------------------------------------------------------------------------------------------------------------------------------------------------------------------------------------------------------------------------|--------------------------------|------------------------------|---------------------|---------------------------|
| 26/02/2020     | (((((geriatric OR elder OR elderly OR late-life OR old age OR old OR early-onset OR late-onset OR older))) AND (major depressive disorder OR depressive OR depressed OR depression))) AND (voxel-based morphometry OR voxel-based OR morphometry OR VBM))                                                                                                                                                                                                                                                                                                                                                                                                                                                                                                                                                                                                                                                                                                                                                                                                                                                                                                                                                                                                                                                                                                                                                                                                                                                                                                                                                                                  | PubMed                         | 493                          | 1                   | Fixed terms               |
| 09/03/2020     | ((((((((geriatric OR elder) OR elderly) OR old age) OR old) OR early-onset) OR late-onset) OR older) OR late-life) AND (((major depressive disorder) OR depressive) OR depressed) OR depression) AND (((voxel-based morphometry) OR voxel-based) OR VBM) OR cortical thickness)                                                                                                                                                                                                                                                                                                                                                                                                                                                                                                                                                                                                                                                                                                                                                                                                                                                                                                                                                                                                                                                                                                                                                                                                                                                                                                                                                            | PubMed                         | 9                            | 394                 | Fixed terms               |
| 09/03/2020     | ((((((((geriatric OR elder) OR elderly) OR old age) OR old) OR early-onset) OR late-onset) OR older) OR late-life) AND (((major depressive disorder) OR depressive) OR depressed) OR depression) AND (((voxel-based morphometry) OR voxel-based) OR VBM) OR cortical thickness)                                                                                                                                                                                                                                                                                                                                                                                                                                                                                                                                                                                                                                                                                                                                                                                                                                                                                                                                                                                                                                                                                                                                                                                                                                                                                                                                                            | PubMed                         | 214                          | 421                 | Fixed terms               |
| 27/04/2020     | ((((major depressive disorder) OR depressive) OR depressed) OR depression) AND (((voxel-based morphometry) OR voxel-based) OR VBM) OR cortical thickness)                                                                                                                                                                                                                                                                                                                                                                                                                                                                                                                                                                                                                                                                                                                                                                                                                                                                                                                                                                                                                                                                                                                                                                                                                                                                                                                                                                                                                                                                                  | PubMed                         | 489                          | 636                 | Fixed terms               |
| 12/05/2020     | ((((major depressive disorder) OR depressive) OR depressed) OR depression) AND (((voxel-based morphometry) OR voxel-based) OR VBM) OR cortical thickness)                                                                                                                                                                                                                                                                                                                                                                                                                                                                                                                                                                                                                                                                                                                                                                                                                                                                                                                                                                                                                                                                                                                                                                                                                                                                                                                                                                                                                                                                                  | Web of Science (all databases) | 1,219                        | 1035                | Fixed terms               |
| 13/05/2020     | ((("voxel-bas* morphometri*" OR "cortic* region*" OR "cortic* thick*" OR "brain* structur*" OR "brain* volum*" OR "structur* brain* network*" OR "structur* covari* network*" OR "cerebellar* volum*" OR "cortic* thin*" OR "cortic* volum*" OR "high-resolut* structur*" OR "surface-bas* morphometri*" OR "structur* differ*" OR "volum* differ*" OR "cortic* surfac*" OR "structur* brain* correl*" OR "volum* increas*" OR "brain* morpholog*" OR "cortic* morpholog*" OR "brain* morphometri*" OR "comput* anatomi* toolbox*" OR "t1-weight* structur* magnet* reson* imag*" OR "cortic* gyrif*" OR "volum* reduct*" OR "volumetr* reduct*" OR "multi-mod* magnet* reson* imag*" OR "brain* structur* integr*" OR "voxel-bas* lesion-symptom* mapping" OR "gray-matt* volum*" OR "voxel* base* morphometri*" OR "smaller* hippocamp* volum*" OR "subcort* pattern*" OR "hippocamp* subfield* volum*" OR "matter* volum* chang*" OR "grey-matt* volum*" OR "reduc* hippocamp* volum*" OR "brain* atrophi*") AND ("depress* patient*" OR "major* depress*" OR "unipolar* depress*" OR "cognit* behavior* therapi*" OR "major* depress* disord*" OR "depress* compar*" OR "sever* depress*" OR "depress* suicid* attempt*" OR "hamilton* rate* scale*" OR "hamilton* depress* rate* scale*" OR "clinic* depress*" OR "antidepress* treatment*" OR "comorbid* depress*" OR "depress* inventori*" OR "depress* sever*" OR "depress* symptom*" OR "first-episod* medication-na* unipolar*" OR "first-episod* unipolar*") AND ("control* group*" OR "treatment* effect*" OR "treatment* group*" OR "match* control*" OR "patient* compar*")) | Web of Science (all databases) | 200                          | 90                  | litsearch-generated terms |
| 14/05/2020     | ((("late life depression") AND ("voxel based morphometry" OR "cortical thickness" ))                                                                                                                                                                                                                                                                                                                                                                                                                                                                                                                                                                                                                                                                                                                                                                                                                                                                                                                                                                                                                                                                                                                                                                                                                                                                                                                                                                                                                                                                                                                                                       | PubMed                         | 0                            | 23                  | MESH-terms                |
| 14/05/2020     | ((("major depression") AND ("voxel based morphometry" OR "cortical thickness" ))                                                                                                                                                                                                                                                                                                                                                                                                                                                                                                                                                                                                                                                                                                                                                                                                                                                                                                                                                                                                                                                                                                                                                                                                                                                                                                                                                                                                                                                                                                                                                           | PubMed                         | 0                            | 102                 | MESH-terms                |

**TABLE S1B.** Details of updated literature searches conducted as part of the systematic meta-analysis

|            |                                                                                                                                                                                                                                                                                                                                                                                                                                                                                                                                                                                                                                                                                                                                                                                                                                                                                                                                                                                                                                                                                                                                                                                                                                                                                                                                                                                                                                                                                                                                                                                                                                             |                                |    |       |                           |
|------------|---------------------------------------------------------------------------------------------------------------------------------------------------------------------------------------------------------------------------------------------------------------------------------------------------------------------------------------------------------------------------------------------------------------------------------------------------------------------------------------------------------------------------------------------------------------------------------------------------------------------------------------------------------------------------------------------------------------------------------------------------------------------------------------------------------------------------------------------------------------------------------------------------------------------------------------------------------------------------------------------------------------------------------------------------------------------------------------------------------------------------------------------------------------------------------------------------------------------------------------------------------------------------------------------------------------------------------------------------------------------------------------------------------------------------------------------------------------------------------------------------------------------------------------------------------------------------------------------------------------------------------------------|--------------------------------|----|-------|---------------------------|
| 27/10/2020 | (((((geriatric OR elder OR elderly OR late-life OR old age OR old OR early-onset OR late-onset OR older))) AND (major depressive disorder OR depressive OR depressed OR depression))) AND (voxel-based morphometry OR voxel-based OR morphometry OR VBM))                                                                                                                                                                                                                                                                                                                                                                                                                                                                                                                                                                                                                                                                                                                                                                                                                                                                                                                                                                                                                                                                                                                                                                                                                                                                                                                                                                                   | PubMed                         | 67 | 1,785 | Fixed terms               |
| 27/10/2020 | ((((((((geriatric OR elder OR elderly OR old age) OR old) OR early-onset) OR late-onset) OR older) OR late-life) AND (((major depressive disorder) OR depressive) OR depressed) OR depression) AND (((voxel-based morphometry) OR voxel-based) OR VBM) OR cortical thickness)                                                                                                                                                                                                                                                                                                                                                                                                                                                                                                                                                                                                                                                                                                                                                                                                                                                                                                                                                                                                                                                                                                                                                                                                                                                                                                                                                               | PubMed                         | 6  | 274   | Fixed terms               |
| 27/10/2020 | ((((((((geriatric OR elder OR elderly OR old age) OR old) OR early-onset) OR late-onset) OR older) OR late-life) AND (((major depressive disorder) OR depressive) OR depressed) OR depression) AND (((voxel-based morphometry) OR voxel-based) OR VBM) OR cortical thickness)                                                                                                                                                                                                                                                                                                                                                                                                                                                                                                                                                                                                                                                                                                                                                                                                                                                                                                                                                                                                                                                                                                                                                                                                                                                                                                                                                               | PubMed                         | 8  | 487   | Fixed terms               |
| 27/10/2020 | ((((major depressive disorder) OR depressive) OR depressed) OR depression) AND (((voxel-based morphometry) OR voxel-based) OR VBM) OR cortical thickness)                                                                                                                                                                                                                                                                                                                                                                                                                                                                                                                                                                                                                                                                                                                                                                                                                                                                                                                                                                                                                                                                                                                                                                                                                                                                                                                                                                                                                                                                                   | PubMed                         | 13 | 649   | Fixed terms               |
| 27/10/2020 | ((((major depressive disorder) OR depressive) OR depressed) OR depression) AND (((voxel-based morphometry) OR voxel-based) OR VBM) OR cortical thickness)                                                                                                                                                                                                                                                                                                                                                                                                                                                                                                                                                                                                                                                                                                                                                                                                                                                                                                                                                                                                                                                                                                                                                                                                                                                                                                                                                                                                                                                                                   | Web of Science (all databases) | 76 | 1,141 | Fixed terms               |
| 27/10/2020 | ((("voxel-bas* morphometri*" OR "cortic* region*" OR "cortic* thick*" OR "brain* structur*" OR "brain* volum*" OR "structur* brain* network*" OR "structur* covari* network*" OR "cerebellar* volum*" OR "cortic* thin*" OR "cortic* volum*" OR "high-resolut* structur*" OR "surface-bas* morphometri*" OR "structur* differ*" OR "volum* differ*" OR "cortic* surfac*" OR "structur* brain* correl*" OR "volum* increas*" OR "brain* morpholog*" OR "cortic* morpholog*" OR "brain* morphometri*" OR "comput* anatomi* toolbox*" OR "t1-weight* structur* magnet* reson* imag*" OR "cortic* gyfir*" OR "volum* reduct*" OR "volumetr* reduct*" OR "multi-mod* magnet* reson* imag*" OR "brain* structur* integr*" OR "voxel-bas* lesion-symptom* mapping" OR "gray-matt* volum*" OR "voxel* base* morphometri*" OR "smaller* hippocamp* volum*" OR "subcort* pattern*" OR "hippocamp* subfield* volum*" OR "matter* volum* chang*" OR "grey-matt* volum*" OR "reduc* hippocamp* volum*" OR "brain* atroph*" ) AND ("depress* patient*" OR "major* depress*" OR "unipolar* depress*" OR "cognit* behavior* therapi*" OR "major* depress* disord*" OR "depress* compar*" OR "sever* depress*" OR "depress* suicid* attempt*" OR "hamilton* rate* scale*" OR "hamilton* depress* rate* scale*" OR "clinic* depress*" OR "antidepress* treatment*" OR "comorbid* depress*" OR "depress* inventori*" OR "depress* sever*" OR "depress* symptom*" OR "first-episod* medication-na* unipolar*" OR "first-episod* unipolar*" ) AND ("control* group*" OR "treatment* effect*" OR "treatment* group*" OR "match* control*" OR "patient* compar*")) | Web of Science (all databases) | 0  | 662   | litsearch-generated terms |
| 27/10/2020 | ((("late life depression") AND ("voxel based morphometry" OR "cortical thickness" ))                                                                                                                                                                                                                                                                                                                                                                                                                                                                                                                                                                                                                                                                                                                                                                                                                                                                                                                                                                                                                                                                                                                                                                                                                                                                                                                                                                                                                                                                                                                                                        | PubMed                         | 0  | 25    | MESH-terms                |
| 27/10/2020 | ((("major depression") AND ("voxel based morphometry" OR "cortical thickness" ))                                                                                                                                                                                                                                                                                                                                                                                                                                                                                                                                                                                                                                                                                                                                                                                                                                                                                                                                                                                                                                                                                                                                                                                                                                                                                                                                                                                                                                                                                                                                                            | PubMed                         | 0  | 108   | MESH-terms                |

## 1.5. Coordinate-based network mapping methods

To illustrate the methodology underlying coordinate-based network mapping, Figure S1 shows seeds derived for each of the 17 LLD studies.

**FIGURE S1.** Study-specific seeds for 17 LLD studies. Whole-brain view (A) and a more detailed view of the hippocampus (B). Five studies specified significant differences in a region of interest such as the hippocampus, or OFC, while the remaining 12 studies reported coordinates of significant differences.

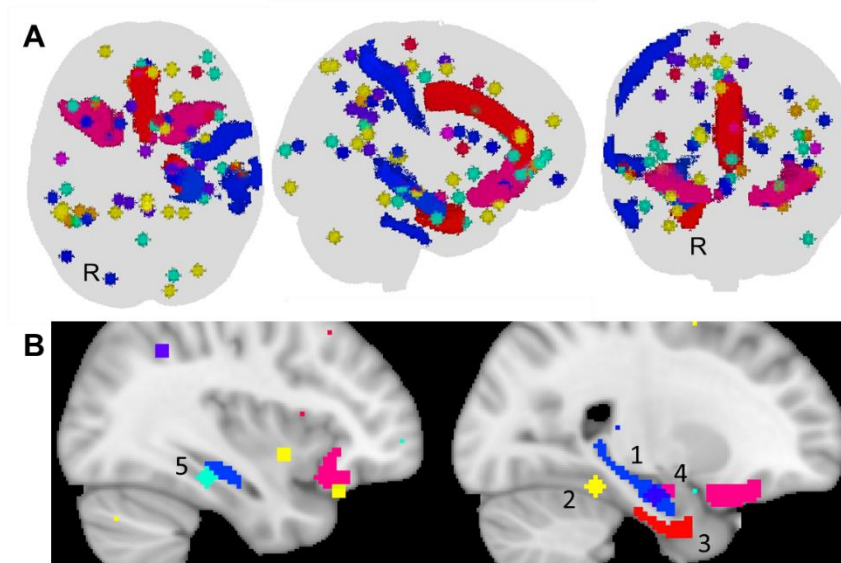

These seed maps were then used in a seed-based analyses of resting-state connectivity and morphometric similarity in unrelated Human Connectome Project (HCP1200) participants. The study-specific connectivity maps derived using the seeds above are shown in Figure S2.

Resting state connectivity analyses were run using the dual regression tool in FSL (14,15). Study-specific network maps were derived by generating group t-statistics for healthy, young participants from HCP1200 and thresholding study-specific t-statistic map at  $t > 3$  (voxelwise  $p < 0.0029$ ). Notably we did not use any MRI image smoothing which is known to boost correlations. Following previous implementations of coordinate-based network mapping, we used the absolute connectivity maps that were binarized for each study and added together to be able to assess which brain networks are affected in most studies investigating MDD and LLD. For subsequent analyses including demographic and clinical information, t-statistics were converted to z-statistics using AFNI 3dcalc ([https://afni.nimh.nih.gov/pub/dist/doc/program\\_help/3dcalc.html](https://afni.nimh.nih.gov/pub/dist/doc/program_help/3dcalc.html)). Group mean maps were transformed from voxel space to surface space to obtain the average z-values for each of the Yeo 7 networks (16).

We developed a novel extension to map out networks derived from each study's seed maps using morphometric similarity (17) instead of resting-state connectivity. The morphometric similarity analyses closely followed the resting-state network construction. The two approaches differed in that morphometric similarity networks were built in *fsaverage* surface-space using 360 regions of interest as network nodes (18), while resting state networks were conducted in *MNI152* voxel space, estimating voxelwise rather than ROI-wise correlations. More specifically, Glasser ROIs

with a significant difference were identified for each study to form a study-specific seed map. Some studies reported coordinates located in white matter, likely due to the excessive amount of smoothing applied to the data. In this case, if a cortical grey matter region was found close to the reported coordinate, then that grey matter region was included in the seed map. Subcortical seeds were not included since morphometric similarity relies on cortical curvature and folding information that is not applicable to subcortical ROIs.

More specifically, 7 regional metrics (gray matter volume, surface area, cortical thickness, intrinsic (Gaussian) curvature; mean curvature, curved index, folding index) were estimated using Freesurfer and ROI-to-ROI correlation between these metrics was computed for each HCP1200 participant. An average of these 7 regional metrics was calculated for the regions included in the study-specific seed map and this morphometric similarity seed was then correlated with each of the 360 Glasser ROIs to produce a subject-specific morphometric similarity network for each HCP1200 participant. For each study, Z-maps were computed based on all 428 participants' seed connectivity maps. Absolute connectivity maps were thresholded at  $z > 1.96$  ( $p < 0.05$ ) and binarized for each study and added together to assess which brain networks are affected in most studies investigating MDD and LLD. Non-thresholded Z-scores were used for subsequent analyses including demographic and clinical information. Average z-values were then analysed in a mixed effect ANOVA using a “between” factor of group (LLD, MDD) and a “within” factor of Yeo network as well as a “within” factor of modality (resting state, morphometric similarity, Figure 2, Table S3).



**FIGURE S2.** Study-specific network maps for 17 LLD studies derived using resting-state connectivity.

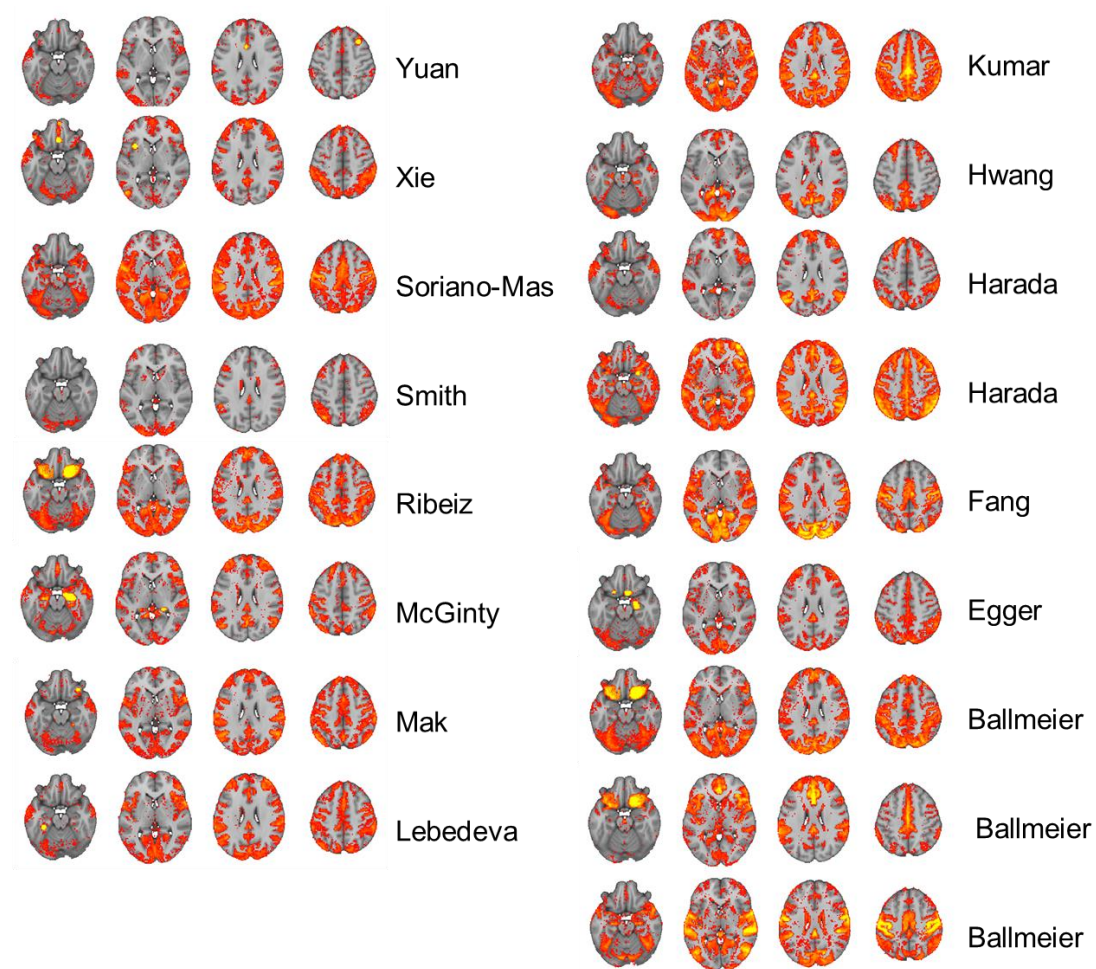

## 2. RESULTS

### 2.1. ALE group mean maps

Twelve late-life depression (754 subjects, 51 unique foci) studies, and 107 major-depression (11,008 subjects, 760 unique foci) studies were included in the first and second ALE analysis, respectively. Some studies did not report any coordinates since they focused on anatomical regions of interest and were thus not suitable for the ALE approach.

ALE analyses identified two significant clusters in MDD studies, involving the medial prefrontal cortex and bilateral temporal lobes (see Figure S3A and Table S2A). A single significant cluster was identified for the LLD studies involving the medial frontal cortex (Figure S3B). To illustrate trend results, uncorrected z-scores from the ALE meta-analysis were thresholded at  $z > 2$  and presented with the significant clusters (in green). More details about which regions contributed to this pattern can be found in Table S2B. Finally, a contrast analysis (Figure S3C) was used to evaluate the uniqueness of the affected areas. Regions common to both LLD and MDD were the bilateral anterior cingulate gyrus and the right subcallosal gyrus. In contrast, LLD was more associated with regions just anterior to this in the bilateral medial frontal gyrus, superior frontal gyrus, and the anterior cingulate cortex. There were no regions where MDD was associated with a higher likelihood than LLD (for more details, see Table S2C).

**FIGURE S3.** Activation likelihood estimation results. In green are clusters that survived family-wise error correction (PFWE $<0.05$ ), and in red are shown the uncorrected z-scores thresholded at  $z > 2$ . Panel A) shows ALE results for MDD studies, panel B) shows results for LLD studies, and panel C) shows the results of the contrast analysis.

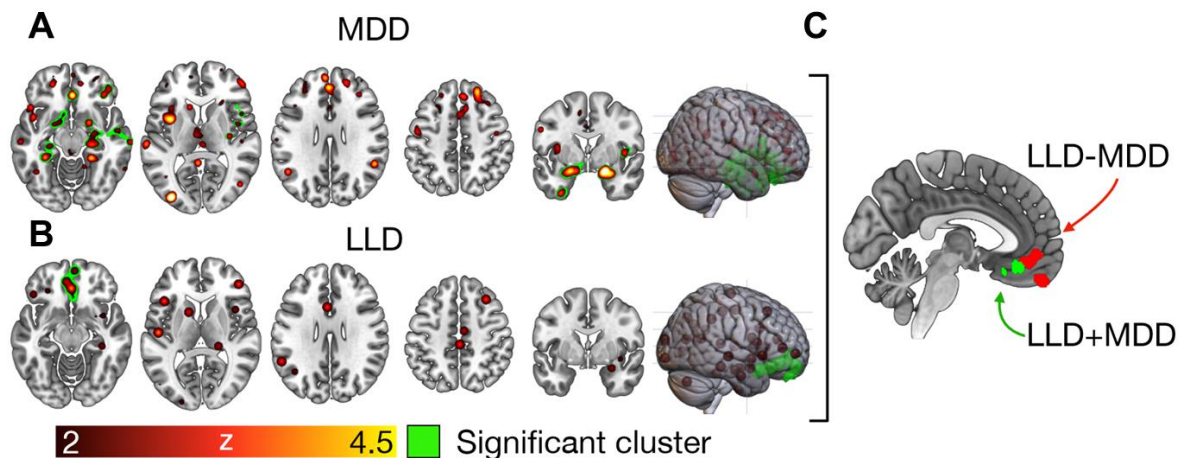

**TABLE S2A.** Significant clusters identified for MDD studies using ALE meta-analysis. X, Y, Z: MNI X,Y,Z, coordinates; ALE: Activation likelihood estimation probability; PFWE: familywise-error corrected p-value; BA: Brodmann Area.

| Cluster | X   | Y   | Z   | Z-score | ALE  | PFWE        | Hemisphere | Gray matter region      | BA |
|---------|-----|-----|-----|---------|------|-------------|------------|-------------------------|----|
| 1       | 20  | 0   | -18 | 5.2     | 0.04 | 8.40E-08    | Right      | Parahippocampal Gyrus   | 34 |
| 1       | 26  | 22  | -24 | 4.8     | 0.03 | 8.01E-07    | Right      | Inferior Frontal Gyrus  | 47 |
| 1       | 36  | 22  | -4  | 4.2     | 0.03 | 1.53E-05    | Right      | Insula                  |    |
| 1       | 14  | -6  | -26 | 3.9     | 0.03 | 5.32E-05    | Right      | Parahippocampal Gyrus   | 34 |
| 1       | 48  | 10  | 2   | 3.8     | 0.02 | 7.10E-05    | Right      | Precentral Gyrus        | 44 |
| 1       | 36  | -20 | -28 | 3.7     | 0.02 | 9.13E-05    | Right      | Parahippocampal Gyrus   | 36 |
| 1       | 44  | 40  | -16 | 3.7     | 0.02 | 1.21E-04    | Right      | Middle Frontal Gyrus    | 47 |
| 1       | 24  | -24 | -14 | 3.6     | 0.02 | 1.57E-04    | Right      | Parahippocampal Gyrus   | 35 |
| 1       | 48  | -6  | -6  | 3.4     | 0.02 | 3.20E-04    | Right      | Insula                  | 13 |
| 1       | 38  | 34  | -12 | 3.2     | 0.02 | 8.13E-04    | Right      | Inferior Frontal Gyrus  | 47 |
| 1       | 30  | 18  | -40 | 3.1     | 0.02 | 9.99E-04    | Right      | Superior Temporal Gyrus | 38 |
| 1       | 42  | 0   | 4   | 3.1     | 0.02 | 0.001003205 | Right      | Clastrum                |    |
| 1       | 70  | -22 | -14 | 3.0     | 0.02 | 0.001226654 | Right      | Middle Temporal Gyrus   | 21 |
| 1       | 20  | 14  | -34 | 3.0     | 0.02 | 0.001425992 | Right      | Inferior Frontal Gyrus  | 47 |
| 1       | 34  | -14 | 6   | 3.0     | 0.02 | 0.001457851 | Right      | Putamen                 |    |
| 1       | 34  | 28  | -22 | 2.8     | 0.02 | 0.00232136  | Right      | Inferior Frontal Gyrus  | 47 |
| 1       | 56  | -16 | -6  | 2.8     | 0.02 | 0.002697906 | Right      | Superior Temporal Gyrus | 22 |
| 1       | 54  | -8  | -22 | 2.3     | 0.01 | 0.010594586 | Right      | Middle Temporal Gyrus   | 21 |
| 1       | 60  | -24 | -6  | 2.1     | 0.01 | 0.017787304 | Right      | Superior Temporal Gyrus | 21 |
| 1       | 42  | 22  | 12  | 2.1     | 0.01 | 0.019114463 | Right      | Insula                  | 13 |
| 1       | 50  | 14  | 18  | 2.0     | 0.01 | 0.020386685 | Right      | Inferior Frontal Gyrus  | 9  |
| 1       | 44  | -12 | -14 | 2.0     | 0.01 | 0.020619739 | Right      | Sub-Gyral Gray Matter   | 21 |
| 1       | 36  | -10 | -2  | 2.0     | 0.01 | 0.021013288 | Right      | Putamen                 |    |
| 1       | 48  | 52  | -14 | 2.0     | 0.01 | 0.022843895 | Right      | Middle Frontal Gyrus    | 10 |
| 1       | 28  | 10  | -30 | 2.0     | 0.01 | 0.024468813 | Right      | Superior Temporal Gyrus | 38 |
| 2       | 0   | 34  | -14 | 4.5     | 0.03 | 2.75E-06    | Left       | Anterior Cingulate      | 32 |
| 2       | -22 | -2  | -18 | 4.3     | 0.03 | 8.72E-06    | Left       | Parahippocampal Gyrus   | 34 |
| 2       | -20 | -16 | -26 | 4.2     | 0.03 | 1.14E-05    | Left       | Parahippocampal Gyrus   | 28 |
| 2       | -32 | -40 | -10 | 3.8     | 0.02 | 6.18E-05    | Left       | Parahippocampal Gyrus   | 37 |
| 2       | 2   | 32  | 2   | 3.7     | 0.02 | 1.03E-04    | Left       | Anterior Cingulate      | 24 |
| 2       | 6   | 18  | -26 | 3.6     | 0.02 | 1.41E-04    | Right      | Medial Frontal Gyrus    | 25 |
| 2       | -32 | 0   | -44 | 3.3     | 0.02 | 5.76E-04    | Left       | Uncus                   | 20 |
| 2       | -2  | 36  | -24 | 3.2     | 0.02 | 7.02E-04    | Left       | Medial Frontal Gyrus    | 11 |
| 2       | -30 | -18 | -18 | 3.1     | 0.02 | 0.001072651 | Left       | Hippocampus             |    |
| 2       | -4  | 20  | -20 | 3.0     | 0.02 | 0.00131098  | Left       | Sub-Gyral Gray Matter   | 25 |
| 2       | -36 | -14 | -32 | 3.0     | 0.02 | 0.001419705 | Left       | Uncus                   | 20 |

|   |     |     |     |     |      |             |       |                       |    |
|---|-----|-----|-----|-----|------|-------------|-------|-----------------------|----|
| 2 | -24 | -28 | -20 | 2.9 | 0.02 | 0.001826203 | Left  | Parahippocampal Gyrus | 35 |
| 2 | -10 | 10  | -8  | 2.6 | 0.02 | 0.004113356 | Left  | Caudate Head          |    |
| 2 | -26 | -26 | -12 | 2.6 | 0.01 | 0.005198211 | Left  | Parahippocampal Gyrus | 28 |
| 2 | -10 | 24  | -4  | 2.3 | 0.01 | 0.010433223 | Left  | Caudate Head          |    |
| 2 | 8   | 32  | -26 | 2.2 | 0.01 | 0.012782307 | Right | Medial Frontal Gyrus  | 11 |
| 2 | -6  | 0   | -8  | 1.8 | 0.01 | 0.035651743 | Left  | Lentiform Nucleus     |    |

**TABLE S2B.** Significant clusters identified for LLD studies using ALE meta-analysis. X, Y, Z: MNI X,Y,Z, coordinates; ALE: Activation likelihood estimation probability; PFWE: familywise-error corrected p-value; BA: Brodmann Area.

| Cluster | x  | y  | z   | Z    | ALE  | P <sub>FWE</sub> | Hemisphere | Gray matter region   | BA |
|---------|----|----|-----|------|------|------------------|------------|----------------------|----|
| 1       | 2  | 26 | -18 | 3.71 | 0.01 | 1.05E-04         | Right      | Medial Frontal Gyrus | 11 |
| 1       | 4  | 58 | -16 | 3.66 | 0.01 | 1.24E-04         | Right      | Medial Frontal Gyrus | 10 |
| 1       | -2 | 52 | -4  | 3.63 | 0.01 | 1.40E-04         | Left       | Anterior Cingulate   | 32 |
| 1       | 0  | 38 | -12 | 3.60 | 0.01 | 1.56E-04         | Left       | Anterior Cingulate   | 32 |
| 1       | -6 | 46 | -8  | 3.40 | 0.01 | 3.41E-04         | Left       | Anterior Cingulate   | 32 |
| 1       | -4 | 52 | -28 | 3.23 | 0.01 | 6.14E-04         | Left       | Medial Frontal Gyrus | 11 |
| 1       | 6  | 14 | -20 | 3.16 | 0.01 | 7.88E-04         | Right      | Subcallosal Gyrus    | 25 |

**TABLE S2C.** Significant clusters identified for Contrast between LLD and MDD studies using ALE meta-analysis. X, Y, Z: MNI X,Y,Z, coordinates; ALE: Activation likelihood estimation probability; P<sub>FWE</sub>: familywise-error corrected p-value; BA: Brodmann Area.

| Contrast  | Cluster | x  | y  | z   | Z    | ALE    | P <sub>FWE</sub> | Hemisphere | Gray Matter Region   | BA |
|-----------|---------|----|----|-----|------|--------|------------------|------------|----------------------|----|
| LLD - MDD | 1       | -6 | 40 | -12 | 2.65 | NA     | 0.004            | Left       | Anterior Cingulate   | 32 |
| LLD - MDD | 1       | -2 | 42 | -12 | 2.58 | NA     | 0.005            | Left       | Anterior Cingulate   | 32 |
| LLD - MDD | 1       | -2 | 40 | -8  | 2.46 | NA     | 0.007            | Left       | Anterior Cingulate   | 24 |
| LLD - MDD | 1       | -2 | 48 | -4  | 2.26 | NA     | 0.012            | Left       | Anterior Cingulate   | 32 |
| LLD - MDD | 1       | -2 | 49 | -8  | 2.23 | NA     | 0.013            | Left       | Anterior Cingulate   | 32 |
| LLD - MDD | 1       | 4  | 58 | -2  | 1.76 | NA     | 0.039            | Right      | Medial Frontal Gyrus | 10 |
| LLD - MDD | 2       | 0  | 52 | -22 | 2.33 | NA     | 0.01             | Left       | Medial Frontal Gyrus | 10 |
| LLD - MDD | 2       | -3 | 57 | -25 | 2.17 | NA     | 0.015            | Left       | Medial Frontal Gyrus | 11 |
| LLD - MDD | 2       | 2  | 52 | -28 | 1.98 | NA     | 0.024            | Right      | Medial Frontal Gyrus | 11 |
| LLD - MDD | 2       | 4  | 62 | -14 | 1.93 | NA     | 0.027            | Right      | Medial Frontal Gyrus | 10 |
| LLD - MDD | 2       | 4  | 58 | -20 | 1.81 | NA     | 0.035            | Right      | Medial Frontal Gyrus | 10 |
| LLD - MDD | 2       | 8  | 60 | -14 | 1.7  | NA     | 0.045            | Right      | Medial Frontal Gyrus | 10 |
| LLD - MDD | 3       | 6  | 22 | -16 | 1.88 | NA     | 0.03             | Right      | Anterior Cingulate   | 32 |
| LLD - MDD | 3       | 2  | 26 | -14 | 1.8  | NA     | 0.036            | Right      | Anterior Cingulate   | 24 |
| LLD + MDD | 1       | 0  | 38 | -12 |      | 0.0101 | NA               | Left       | Anterior Cingulate   | 32 |
| LLD + MDD | 1       | 6  | 14 | -20 |      | 0.0088 | NA               | Right      | Subcallosal Gyrus    | 25 |

|           |   |   |    |     |        |    |       |                    |    |
|-----------|---|---|----|-----|--------|----|-------|--------------------|----|
| LLD + MDD | 1 | 2 | 28 | -16 | 0.0079 | NA | Right | Anterior Cingulate | 24 |
| LLD + MDD | 1 | 0 | 24 | -18 | 0.0077 | NA | Left  | Anterior Cingulate | 32 |

## 2.2. Robustness analyses

We reanalysed the data three times: firstly, excluding one LLD study of remitted geriatric depression patients; secondly, excluding two LLD studies of participants 57 and 59 years old, respectively; thirdly, excluding five LLD studies and 21 MDD studies that reported their results in regions of interest rather than in coordinates. The cut-off score for LLD is somewhat arbitrary and is often considered to be 60 years of age (19,20). In the main text we provide the most inclusive analysis (whereby we include two studies of patients with late-life depression with a mean age of 56 and 59 years), but also present the results of a more stringent reanalysis (studies with average age greater than 60 years) here. Briefly, the results of the main analysis replicated in all of the re-analyses as shown in the summary of three-way ANOVA results in in Table S3.

**TABLE S3.** ANOVA results from the analysis of the full sample and three additional reanalyses. When the sphericity assumption was violated (assessed by the presence of a significant Mauchly’s test result), we used Greenhouse-Geisser correction to the degrees of freedom of the mixed-effect ANOVA, which reduces the degrees of freedom to correct for the lack of sphericity. SPSS v25 was used for these comparisons.

| Main Effects                                                                                                                    |       |                            |        | 2-Way Interactions      |       |                           |       | 3-Way Interaction            |       |
|---------------------------------------------------------------------------------------------------------------------------------|-------|----------------------------|--------|-------------------------|-------|---------------------------|-------|------------------------------|-------|
| <b>Analysis of the full sample</b>                                                                                              |       |                            |        |                         |       |                           |       |                              |       |
| Group (LLD vs MDD)                                                                                                              |       | Network (Yeo 7)            |        | Modality                |       | Group by Network          |       | Group by Modality            |       |
| F <sub>1,143</sub> =0.3                                                                                                         | p=.85 | F <sub>3,430</sub> =42.8   | p<.001 | F <sub>1,143</sub> =4.7 | p=.03 | F <sub>3,430</sub> =0.4   | p=.75 | F <sub>1,143</sub> =1.0      | p=.32 |
|                                                                                                                                 |       |                            |        |                         |       | Modality by Network       |       | Group by Modality by Network |       |
|                                                                                                                                 |       |                            |        |                         |       | F <sub>3,426</sub> =2.3   |       | p=.08                        |       |
|                                                                                                                                 |       |                            |        |                         |       |                           |       | F <sub>3,426</sub> =1.2      |       |
|                                                                                                                                 |       |                            |        |                         |       |                           |       | p=.29                        |       |
| Group (Late- vs Mixed-onset LLD)                                                                                                |       | Network (Yeo 7)            |        | Modality                |       | Group by Network          |       | Group by Modality            |       |
| F <sub>1,15</sub> =1.2                                                                                                          | p=.30 | F <sub>2,5,38</sub> =14.9  | p<.001 | F <sub>1,15</sub> =0.1  | p=.75 | F <sub>2,5,38</sub> =1.8  | p=.16 | F <sub>1,15</sub> =4.9       | p=.04 |
|                                                                                                                                 |       |                            |        |                         |       |                           |       | Modality by Network          |       |
|                                                                                                                                 |       |                            |        |                         |       |                           |       | F <sub>2,7,40</sub> =1.0     |       |
|                                                                                                                                 |       |                            |        |                         |       |                           |       | p=.39                        |       |
|                                                                                                                                 |       |                            |        |                         |       |                           |       | F <sub>2,7,40</sub> =1.2     |       |
|                                                                                                                                 |       |                            |        |                         |       |                           |       | p=.33                        |       |
| <b>Reanalysis excluding Yuan et al (remitted LLD)</b>                                                                           |       |                            |        |                         |       |                           |       |                              |       |
| Group (LLD vs MDD)                                                                                                              |       | Network (Yeo 7)            |        | Modality                |       | Group by Network          |       | Group by Modality            |       |
| F <sub>1,142</sub> =0.29                                                                                                        | p=.59 | F <sub>3,426</sub> =41.8   | p<.001 | F <sub>1,142</sub> =4.6 | p=.03 | F <sub>3,426</sub> =0.4   | p=.77 | F <sub>1,142</sub> =0.9      | p=.35 |
|                                                                                                                                 |       |                            |        |                         |       |                           |       | Modality by Network          |       |
|                                                                                                                                 |       |                            |        |                         |       |                           |       | F <sub>3,422</sub> =2.2      |       |
|                                                                                                                                 |       |                            |        |                         |       |                           |       | p=.09                        |       |
|                                                                                                                                 |       |                            |        |                         |       |                           |       | F <sub>3,422</sub> =1.2      |       |
|                                                                                                                                 |       |                            |        |                         |       |                           |       | p=.29                        |       |
| Group (Late- vs Mixed-onset LLD)                                                                                                |       | Network (Yeo 7)            |        | Modality                |       | Group by Network          |       | Group by Modality            |       |
| F <sub>1,14</sub> =3.2                                                                                                          | p=.09 | F <sub>2,6,36</sub> =15.8  | p<.001 | F <sub>1,14</sub> =0.03 | p=.88 | F <sub>2,6,36</sub> =2.4  | p=.09 | F <sub>1,14</sub> =4.8       | p=.04 |
|                                                                                                                                 |       |                            |        |                         |       |                           |       | Modality by Network          |       |
|                                                                                                                                 |       |                            |        |                         |       |                           |       | F <sub>2,6,37</sub> =1.2     |       |
|                                                                                                                                 |       |                            |        |                         |       |                           |       | p=.32                        |       |
|                                                                                                                                 |       |                            |        |                         |       |                           |       | F <sub>2,6,37</sub> =1.4     |       |
|                                                                                                                                 |       |                            |        |                         |       |                           |       | p=.27                        |       |
| <b>Reanalysis excluding Fang et al 2015 and Harada et al 2018 with strict age inclusion criteria (&gt;60 years old) for LLD</b> |       |                            |        |                         |       |                           |       |                              |       |
| Group (LLD vs MDD)                                                                                                              |       | Network (Yeo 7)            |        | Modality                |       | Group by Network          |       | Group by Modality            |       |
| F <sub>1,141</sub> =0.01                                                                                                        | p=.91 | F <sub>3,429</sub> =36.4   | p<.001 | F <sub>1,141</sub> =5.5 | p=.02 | F <sub>3,429</sub> =0.6   | p=.60 | F <sub>1,141</sub> =0.42     | p=.52 |
|                                                                                                                                 |       |                            |        |                         |       |                           |       | Modality by Network          |       |
|                                                                                                                                 |       |                            |        |                         |       |                           |       | F <sub>3,424</sub> =1.9      |       |
|                                                                                                                                 |       |                            |        |                         |       |                           |       | p=.12                        |       |
|                                                                                                                                 |       |                            |        |                         |       |                           |       | F <sub>3,424</sub> =1.0      |       |
|                                                                                                                                 |       |                            |        |                         |       |                           |       | p=.40                        |       |
| Group (Late- vs Mixed-onset LLD)                                                                                                |       | Network (Yeo 7)            |        | Modality                |       | Group by Network          |       | Group by Modality            |       |
| F <sub>1,13</sub> =0.2                                                                                                          | p=.65 | F <sub>2,6,33</sub> =12.3  | p<.001 | F <sub>1,13</sub> =0.3  | p=.59 | F <sub>2,6,33</sub> =0.6  | p=.57 | F <sub>1,13</sub> =4.7       | p=.04 |
|                                                                                                                                 |       |                            |        |                         |       |                           |       | Modality by Network          |       |
|                                                                                                                                 |       |                            |        |                         |       |                           |       | F <sub>2,9,38</sub> =0.6     |       |
|                                                                                                                                 |       |                            |        |                         |       |                           |       | p=.62                        |       |
|                                                                                                                                 |       |                            |        |                         |       |                           |       | F <sub>2,9,38</sub> =0.8     |       |
|                                                                                                                                 |       |                            |        |                         |       |                           |       | p=.49                        |       |
| <b>Reanalysis excluding studies that reported results as ROIs instead of coordinates</b>                                        |       |                            |        |                         |       |                           |       |                              |       |
| Group (LLD vs MDD)                                                                                                              |       | Network (Yeo 7)            |        | Modality                |       | Group by Network          |       | Group by Modality            |       |
| F <sub>1,117</sub> =0.08                                                                                                        | p=.77 | F <sub>2,9,334</sub> =33.2 | p<.001 | F <sub>1,117</sub> =1.1 | p=.30 | F <sub>2,9,334</sub> =0.4 | p=.73 | F <sub>1,117</sub> =0.9      | p=.33 |
|                                                                                                                                 |       |                            |        |                         |       |                           |       | Modality by Network          |       |
|                                                                                                                                 |       |                            |        |                         |       |                           |       | F <sub>2,9,338</sub> =1.7    |       |
|                                                                                                                                 |       |                            |        |                         |       |                           |       | p=.17                        |       |
|                                                                                                                                 |       |                            |        |                         |       |                           |       | F <sub>2,9,338</sub> =0.8    |       |
|                                                                                                                                 |       |                            |        |                         |       |                           |       | p=.47                        |       |
| Group (Late- vs Mixed-onset LLD)                                                                                                |       | Network (Yeo 7)            |        | Modality                |       | Group by Network          |       | Group by Modality            |       |
| F <sub>1,10</sub> =0.8                                                                                                          | p=.38 | F <sub>2,3,23</sub> =11.5  | p<.001 | F <sub>1,10</sub> =0.01 | p=.96 | F <sub>2,3,23</sub> =1.2  | p=.34 | F <sub>1,10</sub> =6.1       | p=.03 |
|                                                                                                                                 |       |                            |        |                         |       |                           |       | Modality by Network          |       |
|                                                                                                                                 |       |                            |        |                         |       |                           |       | F <sub>2,2,22</sub> =0.3     |       |
|                                                                                                                                 |       |                            |        |                         |       |                           |       | p=.74                        |       |
|                                                                                                                                 |       |                            |        |                         |       |                           |       | F <sub>2,2,22</sub> =0.9     |       |
|                                                                                                                                 |       |                            |        |                         |       |                           |       | p=.44                        |       |

We also re-created the group mean maps for LLD and MDD before and after the inclusion of cortical thickness studies. As shown in Figure S3, these maps were very similar to each other. No striatal voxels and only very few hippocampal voxels were shared in LLD and in MDD regardless of the cortical thickness study inclusion. This is likely due to the connectivity profiles from the resting state functional and morphometric similarity analyses.

**FIGURE S3.** Group mean maps for MDD (A) and LLD (B) before and after exclusion of cortical thickness studies. 128 MDD studies before and 91 MDD studies after the exclusion of cortical thickness studies were combined to create group mean maps in (A). 17 LLD studies before and 11 LLD studies after the exclusion of cortical thickness studies were combined to create group mean maps in (B). CT: cortical thickness

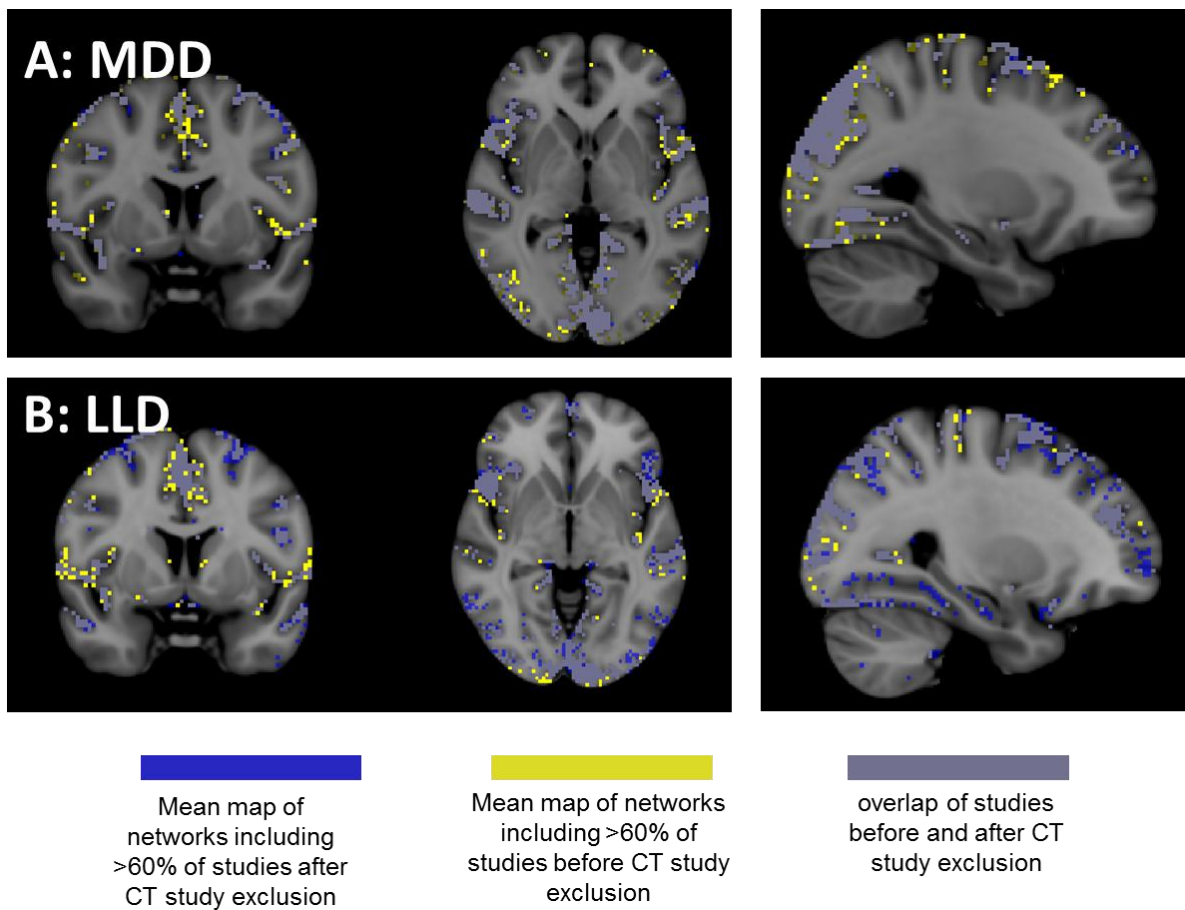

### 2.3 Sensitivity analysis

To assess the stability of the antidepressant effects on networks derived using resting state network mapping, we reanalysed a subset of studies comprising only first episode MDD in younger adults (5 studies of first-episode MDD patients taking antidepressants and 29 studies of unmedicated first episode MDD). Using multiple comparison correction ( $P_{FDR} < 0.05$ , *mafdr* function in MATLAB R2016a), no significant associations with antidepressant medication were detected (using *fitlm* function in MATLAB R2016a). However, when the threshold was relaxed to  $P_{UNCORRECTED} < 0.05$ , some of the results reported in the main analysis were replicated, with the ACC (left BA32,  $t_{1,27}=2.14$ ,  $P_{UNCORRECTED}=0.04$ ) showing greater involvement in medicated studies (Figure S4). No regions showed greater involvement in unmedicated studies compared with studies of patients on antidepressants even at the uncorrected thresholding level. Compared to the main analysis, notable overlap was found in the anterior cingulate (BA32). Occipito-temporal associations with lower proportion of medicated participants did not replicate in this sensitivity analysis of first episode MDD, possibly due to the lower number of studies available.

**FIGURE S4.** First-episode major depressive disorder (MDD) studies with more participants did not differ in their age (A). They showed more involvement of ACC and frontal operculum (FOP) highlighted in red (B) at  $P_{UNCORRECTED} < 0.05$  level. BA: Brodmann Area

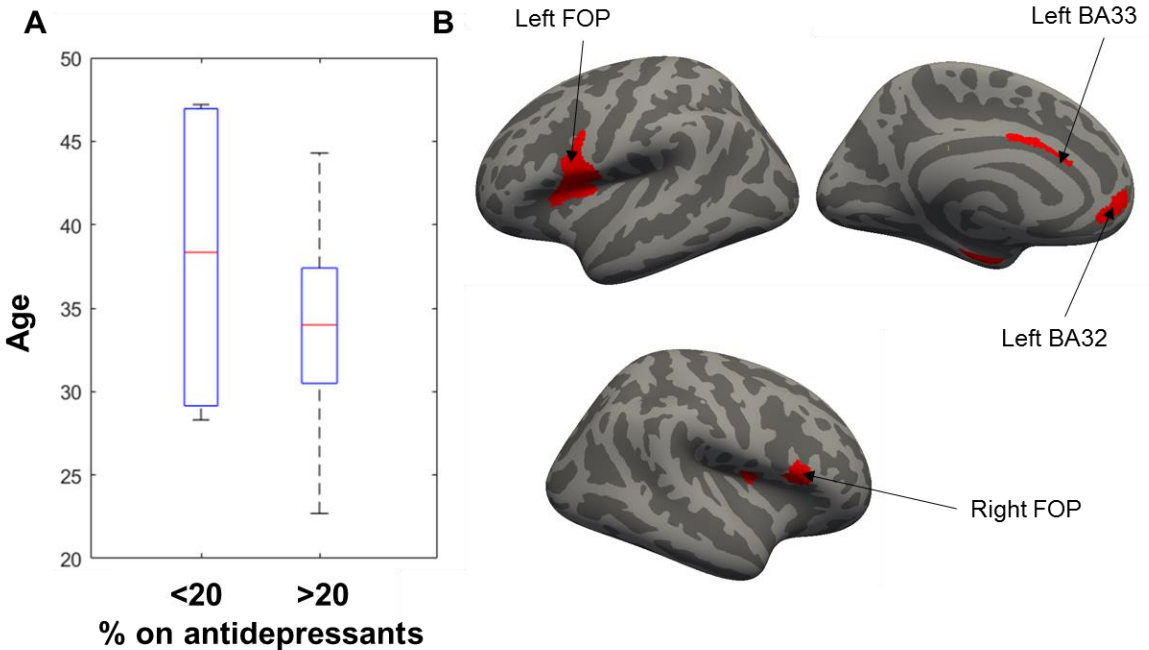



**TABLE S4.** Complete list of studies

| <b>Study MRI-ID</b> | <b>Study Reference-ID</b> |                  |       |
|---------------------|---------------------------|------------------|-------|
| 1. Abe              | (21)                      | 43. Kakeda       | (60)  |
| 2. Ahdidan          | (22)                      | 44. Kandariilova | (61)  |
| 3. Ahn              | (23)                      | 45. Katsuki19    | (62)  |
| 4. Arnone           | (24)                      | 46. Kim          | (63)  |
| 5. Ballmeier        | (25)                      | 47. Kong13       | (64)  |
| 6. Ballmeier04b     | (26)                      | 48. Kong14       | (65)  |
| 7. Ballmeier04c     | (27)                      | 49. Kumar        | (66)  |
| 8. Bergouignan      | (28)                      | 50. Lai          | (67)  |
| 9. Cai              | (29)                      | 51. Lai14        | (68)  |
| 10. Camilleri       | (30)                      | 52. Lai15        | (69)  |
| 11. Canu            | (31)                      | 53. Lai16        | (70)  |
| 12. Chaney          | (32)                      | 54. Lan          | (71)  |
| 13. Chen15          | (33)                      | 55. Lebedeva15   | (72)  |
| 14. Chen16          | (34)                      | 56. Lee11        | (73)  |
| 15. Chen16a         | (35)                      | 57. Lee20        | (74)  |
| 16. Chen18          | (36)                      | 58. Lener16      | (75)  |
| 17. Chen20          | (37)                      | 59. Leung        | (76)  |
| 18. Cheng20         | (38)                      | 60. Li           | (77)  |
| 19. Cheng           | (39)                      | 61. Li19         | (78)  |
| 20. Cui20           | (40)                      | 62. Liao13       | (79)  |
| 21. Dannlowski      | (41)                      | 63. Liu          | (80)  |
| 22. Depping         | (42)                      | 64. Liu20        | (81)  |
| 23. Egger           | (12)                      | 65. Lu18         | (82)  |
| 24. Eindhoven13     | (43)                      | 66. Lu19         | (83)  |
| 25. Fang15          | (44)                      | 67. Ma12         | (84)  |
| 26. Frodl08         | (45)                      | 68. Machino      | (85)  |
| 27. Fung15          | (46)                      | 69. Maggioni     | (86)  |
| 28. Gong19          | (47)                      | 70. Mak          | (87)  |
| 29. Grieve          | (48)                      | 71. Mak09        | (88)  |
| 30. Guo             | (49)                      | 72. Matsubara    | (89)  |
| 31. Han             | (50)                      | 73. McGinty      | (90)  |
| 32. Han20           | (51)                      | 74. Meng20       | (91)  |
| 33. Harada16        | (52)                      | 75. Mwangi12     | (92)  |
| 34. Harada18        | (53)                      | 76. Na14         | (93)  |
| 35. Hellewell       | (54)                      | 77. Na16         | (94)  |
| 36. HellewellRep    | (54)                      | 78. Nakano       | (95)  |
| 37. Hwang           | (11)                      | 79. Nan20        | (96)  |
| 38. Inkster         | (55)                      | 80. Niu17        | (97)  |
| 39. Jarnum          | (56)                      | 81. Opel         | (98)  |
| 40. Jiang           | (57)                      | 82. Opel19       | (99)  |
| 41. Johnston15      | (58)                      | 83. Ozalay       | (100) |
| 42. Jung            | (59)                      | 84. Peng         | (101) |
|                     |                           | 85. Peng14       | (102) |



|                      |        |
|----------------------|--------|
| 86. Peng15           | (103)  |
| 87. Perico           | (104)  |
| 88. Qi14             | (105)  |
| 89. Qiu              | (106)  |
| 90. Qiu16            | (107)  |
| 91. Radoman19        | (108)  |
| 92. Ribeiz           | (109)  |
| 93. RodriguezCano    | (110)  |
| 94. Salvadore        | (111)  |
| 95. Sandu            | (112)\ |
| 96. Scheinost        | (113)  |
| 97. Scheuerecker     | (114)  |
| 98. SerraBlasco      | (115)  |
| 99. Shah             | (116)  |
| 100. Shah02          | (117)  |
| 101. Shen            | (118)  |
| 102. Shen19          | (119)  |
| 103. Shen20          | (120)  |
| 104. Smith           | (13)   |
| 105. SorianoMas      | (121)  |
| 106. Spaeti          | (122)  |
| 107. Sprengelmeyer11 | (123)  |
| 108. Stratmann       | (124)  |
| 109. Suh20           | (125)  |
| 110. Tae15           | (126)  |
| 111. Tang            | (127)  |
| 112. Treadway        | (128)  |
| 113. Treadway15      | (129)  |
| 114. Tu              | (130)  |
| 115. Ueda            | (131)  |

|                |       |
|----------------|-------|
| 116. VanTol    | (132) |
| 117. VanTol14  | (133) |
| 118. Vasic     | (134) |
| 119. Vasic15   | (135) |
| 120. Wagner    | (136) |
| 121. Wagner07  | (137) |
| 122. Watanabe  | (138) |
| 123. Wolf16    | (139) |
| 124. Xie       | (140) |
| 125. Xiong19   | (141) |
| 126. Xu19      | (142) |
| 127. Yang15    | (143) |
| 128. Yang15a   | (144) |
| 129. Yang15b   | (145) |
| 130. Yang17    | (146) |
| 131. Yang17a   | (147) |
| 132. Yang20    | (148) |
| 133. Ye17old   | (149) |
| 134. Ye17young | (149) |
| 135. Yuan      | (1)   |
| 136. Zaremba   | (150) |
| 137. Zhang     | (151) |
| 138. Zhang19   | (152) |
| 139. Zhang20   | (153) |
| 140. Zhao17    | (154) |
| 141. Zhao17a   | (155) |
| 142. Zhou18    | (156) |
| 143. Zhuo17    | (157) |
| 144. Zou       | (158) |
| 145. Zuo18     | (159) |

### **3. Discussion**

#### **3.1. Age and sex effects**

No age or sex effects were found on study-specific networks. Given that age and sex distributions were relatively heterogeneous within studies, it is likely that meta-regressions at the study level would not be sensitive to age and sex effects if those are present. Ethnicity is crucial demographic variable that was rarely recorded and thus could not be included in this analysis. Future studies need to report more information on ethnic characteristics of their samples in order to assess ethnicity-specific brain structure differences in MDD and LLD.

#### **3.2. Similarities and differences between ALE and network mapping results**

While coordinate-based network mapping is able to capture large-scale networks involved in major depression, these networks are more reminiscent of functional connectivity findings (160) and in contrast to traditional ALE methods, network mapping does not capture the medial temporal regions and the striatal nuclei as key loci of structural brain change. Functional connectivity network maps are less likely to include medial temporal lobe and ventral PFC regions due to BOLD signal dropout (161–163) in BOLD imaging.

To illustrate the differences between network mapping and ALE, we propose a synthetic example including four studies, each of which reports a coordinate of case-control differences falling onto the frontoparietal network. Each study reports a coordinate in the anterior left, anterior right, posterior left and posterior right part of the frontoparietal network. ALE would not identify any overlap between these studies since the coordinates not located close to each other. However, coordinate based network mapping leverages the coordinates reported in each study to a connectivity map. Each of these four connectivity maps taps into the frontoparietal network as each of the studies is reporting coordinates in the anterior, posterior, left or right parts of the network. Coordinate-based network mapping is thus able to capture this relationship between studies.

#### **3.3. Similarities and differences between morphometric similarity and functional connectivity network mapping results**

Overall, we see highly consistent morphometric similarity and functional connectivity network mapping results for the group mean maps (Figure 2). However, we see some divergence between morphometric similarity and functional connectivity in the secondary analyses. We report differences between early and late onset LLD only using morphometric similarity and we report effects of medication only using functional connectivity. This pattern of results may have several methodological and conceptual explanations.

Methodologically, morphometric similarity and functional connectivity network mapping follow a separate processing and pipeline once the coordinates are extracted. More specifically, we use FSL to create seed maps for functional connectivity analyses from the extracted coordinates and those seeds are then used in a whole-brain voxel-wise correlation analysis. On the other hand, we used manual mapping of the extracted coordinates onto regions of the HCP parcellation, and the resulting seeds are then used to generate whole-cortex similarity maps based on region-wise similarity to the seed. This means that we could not include subcortical coordinates in

morphometric similarity analyses. These nuanced differences in methods may affect our secondary analyses. Nevertheless, the group mean maps were highly consistent despite any methodological differences.

Conceptually, morphometric similarity aims to capture the similarity of cortical folding patterns and other features of cortical morphology between parts of the brain. Resting state connectivity aims to capture the similarity of blood oxygen level-dependent signal variation between parts of the brain. Therefore, patterns of functional connectivity do not necessarily follow patterns of morphometric similarity. A thorough analysis of the relationship between these two network mapping approaches is beyond the scope of this meta-analysis, however. We propose that the effects of late onset depression are more prominent in structural networks, while the effects of medication are more prominent in functional networks, possibly due to the neurobiological characteristics of structural and functional networks.

### **3.4. Effects of the age of onset of depression on brain structure**

To our knowledge, no meta-analyses of the effects of age of onset on brain structure exist to date. Kempton et al (164) investigated the effects of the age at onset in 23 studies of MDD but did not find significant associations between age at onset and hippocampal volume. Individual studies have reported a negative correlation between years since onset of the first episode of depression with the volumes of the hippocampus (90). Early-onset LLD is associated with smaller hippocampal volumes (165,166), while no significant differences between controls and late-onset LLD or late and early onset LLD were found (166).

Late-onset depression has also been associated with reduced prefrontal volumes (167,168), and increased white matter hyperintensities (169). Neuropsychological evidence also shows frontostriatal-mediated executive dysfunction in late-onset LLD and episodic memory deficits in early-onset depression (170), consistent with the neuroimaging findings. These findings have stimulated the hypothesis that a hippocampal stress-mediated pathway underlies early-onset LLD, while frontostriatal abnormalities driven by cerebrovascular disease underlie late-onset depression (171,172).

Our results from network mapping show a greater degree of impairment in attention/salience and frontoparietal networks in late onset compared to early onset LLD. This evidence is consistent with the argument that there is a greater disease burden in late-onset compared to early-onset LLD. We do not report a hippocampal vs frontostriatal dissociation between early and late onset LLD, but this may be due to the connectivity profiles inherent to the coordinate-based network mapping approach, since it appears to be most sensitive to cortical connectivity patterns as discussed in section 3.2 above.

### **3.5. Effects of medication**

Our coordinate-based network mapping approach revealed that studies that included more participants taking antidepressants found greater involvement of rostral ACC, dorsal ACC, and DIPFC regions. Greater volume or thickness in several regions affected in MDD (notably cingulate, medial prefrontal and orbitofrontal cortices as well as dorsolateral prefrontal cortex) are associated with remission after antidepressant treatment (173). Convergent evidence from nonhuman primates also suggests that antidepressants increase anterior cingulate volume in

animal models of depression (174). Similarly, increased hippocampal volumes may modulate the response to antidepressants (173).

Our finding of increased involvement of the ACC and dlPFC in studies of patients taking antidepressants is consistent with two explanatory hypotheses: first, it is possible that these studies are reporting reduced ACC volume due to greater depression severity. Second, it is possible that these studies are reporting greater volumes of the ACC as a result of antidepressant medication. We therefore checked the direction of the case-control differences in each study that included MDD participants on antidepressant medication. Among 47 studies with over 50% of participants taking antidepressants, 30 studies showed a reduction in the prefrontal regions including ACC or dlPFC, while 26 studies showed a reduction in gray matter in other regions and one study (Johnston et al (58)) showed a gray matter increase in the middle frontal gyrus. Therefore, we argue it is plausible that the ACC involvement in medicated studies is due to greater disease burden since those participants are actively depressed despite taking antidepressants. On the other hand, studies of medicated patients reported fewer differences in medial temporal and visual regions compared to studies of unmedicated actively depressed patients. This may be due to beneficial effects of antidepressant medication that is known to increase neurogenesis (175). Antidepressant treatment may therefore protect against gray matter loss in the medial temporal lobe, though this may not be sufficient for remission in absence of beneficial effects on the structural integrity of the prefrontal cortex.

### **3.6. Methodological considerations and limitations**

While this meta-analysis focused on changes in brain structure in MDD in adults and elderly, it will be crucial to extend these findings to resting-state functional connectivity studies (ReHo, ALFF, seed-based connectivity) in the future. Meta-analytic results we obtained using traditional ALE methods are consistent with other meta-analyses of brain structure in depression in identifying the ACC and medial temporal lobes as key loci of structural impairment in depression. Results from the novel coordinate-based network mapping approach provide a more consistent and wholistic picture of the networks affected in adult MDD and LLD. However, it does not implicate striatal and hippocampal regions and thus provides a complimentary way of synthesizing existing literature to traditional ALE methods. Further, a related limitation is our inclusion of both cortical thickness studies that focus exclusively on the cortical mantle as well as VBM studies that focus on all grey matter regions. While this very inclusive approach aimed to synthesize as many findings of cortical structural changes as possible, it is also likely to miss subcortical structural changes.

Although leveraging coordinate-based information obtained from individual studies to study-specific networks achieves greater consistency, it also introduces biases inherent to connectivity profiles such as high connectivity of occipital and parietal areas. We argue it is valuable to employ different approaches to constructing study-specific networks using morphometric similarity and resting-state connectivity since these approaches allow us to detect network differences in groups stratified according to their clinical profiles.

Finally, as in previous meta-analyses of whole-brain structural differences, we only provide a synthesis of significant findings rather since a complete account of non-significant findings, many of which were not published, was not possible. Direction of the case-control differences in

brain structure was also not considered in this meta-analysis to achieve the greatest inclusivity. A separate focus on increases and decreases may provide a more nuanced network mapping for MDD and LLD. Although we conducted a thorough and comprehensive search, the search tools available may not have been sensitive to all relevant studies.

## REFERENCES

1. Yuan Y, Zhu W, Zhang Z, Bai F, Yu H, Shi Y, *et al.* (2008): Regional Gray Matter Changes Are Associated with Cognitive Deficits in Remitted Geriatric Depression: An Optimized Voxel-Based Morphometry Study. *Biol Psychiatry* 64: 541–544.
2. Grames EM, Stillman AN, Tingley MW, Elphick CS (2019): An automated approach to identifying search terms for systematic reviews using keyword co-occurrence networks. *Methods Ecol Evol* 10: 1645–1654.
3. Hamilton M (2009): A rating scale for depression. *J Neurol Neurosurg Psychiatr* 23: 56–62.
4. Fantino B, Moore N (2009): The self-reported Montgomery-Åsberg depression rating scale is a useful evaluative tool in major depressive disorder. *BMC Psychiatry* 9: 1–6.
5. Lewinsohn PM, Seeley JR, Roberts RE, Allen NB (1997): Center for Epidemiologic Studies Depression Scale (CES-D) as a screening instrument for depression among community-residing older adults. *Psychol Aging* 12: 277–287.
6. Wells, G. A, Shea, B., O’Connell D *et al.* (2009): The Newcastle-Ottawa scale (NOS) for assessing the quality of nonrandomised studies in meta-analyses. [http://www.ohri.ca/programs/clinical\\_epidemiology/oxford.htm](http://www.ohri.ca/programs/clinical_epidemiology/oxford.htm) 2009 Feb 1. 2009.
7. Calati R, Fang F, Mostofsky E, Shen Q, DI Mattei VE, Garcia-Foncillas J, *et al.* (2018): Cancer and suicidal ideation and behaviours: Protocol for a systematic review and meta-analysis. *BMJ Open* 8: 1–5.
8. Higgins J, Green S (2019): *Cochrane Handbook for Systematic Reviews of Interventions*.
9. Weil RS, Hsu JK, Darby RR, Soussand L, Fox MD (2019): Neuroimaging in Parkinson’s disease dementia: connecting the dots. *Brain Commun* 1: 1–17.
10. Lacadie CM, Fulbright RK, Constable RT, Papademetris X (2008): More Accurate Talairach Coordinates for NeuroImaging using Nonlinear Registration. *Neuroimage* 42: 717–725.
11. Hwang JP, Lee TW, Tsai SJ, Chen TJ, Yang CH, Lirng JF, Tsai CF (2010): Cortical and subcortical abnormalities in late-onset depression with history of suicide attempts investigated with MRI and voxel-based morphometry. *J Geriatr Psychiatry Neurol* 23: 171–184.
12. Egger K, Schocke M, Weiss E, Auffinger S, Esterhammer R, Goebel G, *et al.* (2008): Pattern of brain atrophy in elderly patients with depression revealed by voxel-based morphometry. *Psychiatry Res - Neuroimaging* 164: 237–244.
13. Smith GS, Kramer E, Ma Y, Kingsley P, Dhawan V, Chaly T, Eidelberg D (2008): The functional neuroanatomy of geriatric depression. *Int J Geriatr Psychiatry* 3: 211–225.
14. Nickerson LD, Smith SM, Öngür D, Beckmann CF (2017): Using dual regression to investigate network shape and amplitude in functional connectivity analyses. *Front Neurosci* 11: 1–18.
15. Beckmann C, Mackay C, Filippini N, Smith S (2009): Group comparison of resting-state fMRI data using multi-subject ICA and dual regression. *Neuroimage* 47: S148.
16. Yeo BT, Krienen FM, Sepulcre J, Sabuncu MR, Lashkari D, Hollinshead M, *et al.* (2011): The organization of the human cerebral cortex estimated by intrinsic functional connectivity. *J Neurophysiol* 106: 1125–1165.
17. Seidlitz J, Váša F, Shinn M, Romero-Garcia R, Whitaker KJ, Vértes PE, *et al.* (2018): Morphometric Similarity Networks Detect Microscale Cortical Organization and Predict Inter-Individual Cognitive Variation. *Neuron* 97: 231-247.e7.
18. Glasser MF, Coalson TS, Robinson EC, Hacker CD, Harwell J, Yacoub E, *et al.* (2016): A multi-modal parcellation of human cerebral cortex. *Nature* 536: 171–178.
19. Aziz R, Steffens DC (2013): What Are the Causes of Late-Life Depression? *Psychiatr Clin North Am* 36: 497–516.
20. Aziz R, Steffens D (2017): Overlay of Late-Life Depression and Cognitive Impairment. *Focus (Madison)* 15: 35–41.
21. Abe O, Yamasue H, Kasai K, Yamada H, Aoki S, Inoue H, *et al.* (2010): Voxel-based analyses of gray/white matter volume and diffusion tensor data in major depression. *Psychiatry Res - Neuroimaging* 181: 64–70.

22. Ahdidan J, Hviid LB, Chakravarty MM, Ravnkilde B, Rosenberg R, Rodell A, *et al.* (2011): Longitudinal MR study of brain structure and hippocampus volume in major depressive disorder. *Acta Psychiatr Scand* 123: 211–219.
23. Ahn SJ, Kyeong S, Suh SH, Kim JJ, Chung TS, Seok JH (2016): What is the impact of child abuse on gray matter abnormalities in individuals with major depressive disorder: A case control study. *BMC Psychiatry* 16: 1–7.
24. Arnone D, Pegg EJ, McKie S, Downey D, Elliott R, Williams SR, *et al.* (2009): P.2.a.019 Decreased fronto- limbic gray matter volume associated with recurrent major depressive disorder. *Eur Neuropsychopharmacol* 19: S371.
25. Ballmaier M, Kumar A, Thompson PM, Ph D, Narr KL, Ph D, *et al.* (2004): Localizing Gray Matter Deficits in Late-Onset Depression. *Am J Psychiatry* 161: 2091–2099.
26. Ballmaier M, Sowell ER, Thompson PM, Kumar A, Narr KL, Lavretsky H, *et al.* (2004): Mapping brain size and cortical gray matter changes in elderly depression. *Biol Psychiatry* 55: 382–389.
27. Ballmaier M, Toga AW, Blanton RE, Sowell ER, Lavretsky H, Peterson J, *et al.* (2004): Anterior Cingulate, Gyrus Rectus, and Orbitofrontal Abnormalities in Elderly Depressed Patients: An MRI-Based Parcellation of the Prefrontal Cortex. *Am J Psychiatry* 99–108.
28. Bergouignan L, Chupin M, Czechowska Y, Kinkingnéhun S, Lemogne C, Le Bastard G, *et al.* (2009): Can voxel based morphometry, manual segmentation and automated segmentation equally detect hippocampal volume differences in acute depression? *Neuroimage* 45: 29–37.
29. Cai Y, Liu J, Zhang L, Liao M, Zhang Y, Wang L, *et al.* (2014): Grey matter volume abnormalities in patients with bipolar I depressive disorder and unipolar depressive disorder: A voxel-based morphometry study. *Neurosci Bull* 31: 4–12.
30. Camilleri JA, Hoffstaedter F, Zavorotny M, Zöllner R, Wolf RC, Thomann P, *et al.* (2020): Electroconvulsive therapy modulates grey matter increase in a hub of an affect processing network. *NeuroImage Clin* 25. <https://doi.org/10.1016/j.nicl.2019.102114>
31. Canu E, Kostić M, Agosta F, Munjiza A, Ferraro PM, Pesic D, *et al.* (2015): Brain structural abnormalities in patients with major depression with or without generalized anxiety disorder comorbidity. *J Neurol* 262: 1255–1265.
32. Chaney A, Carballedo A, Amico F, Fagan A, Skokauskas N, Meaney J, Frodl T (2014): Effect of childhood maltreatment on brain structure in adult patients with major depressive disorder and healthy participants. *J Psychiatry Neurosci* 39: 50–59.
33. Chen Z, Zhang H, Jia Z, Zhong J, Huang X, Du M, *et al.* (2015): Magnetization Transfer Imaging of Suicidal Patients with Major Depressive Disorder. *Sci Rep* 5: 1–6.
34. Chen Z, Peng W, Sun H, Kuang W, Li W, Jia Z, Gong Q (2016): High-field magnetic resonance imaging of structural alterations in first-episode, drug-naïve patients with major depressive disorder. *Transl Psychiatry* 6: e942.
35. Chen VCH, Shen CY, Liang SHY, Li ZH, Tyan YS, Liao YT, *et al.* (2016): Assessment of abnormal brain structures and networks in major depressive disorder using morphometric and connectome analyses. *J Affect Disord* 205: 103–111.
36. Chen L, Wang Y, Niu C, Zhong S, Hu H, Chen P, *et al.* (2018): Common and distinct abnormal frontal-limbic system structural and functional patterns in patients with major depression and bipolar disorder. *NeuroImage Clin* 20: 42–50.
37. Chen MH, Kao ZK, Chang WC, Tu PC, Hsu JW, Huang KL, *et al.* (2020): Increased Proinflammatory Cytokines, Executive Dysfunction, and Reduced Gray Matter Volumes In First-Episode Bipolar Disorder and Major Depressive Disorder. *J Affect Disord* 274: 825–831.
38. Cheng Y, Xu J, Dong C, Shen Z, Zhou C, Li N, *et al.* (2020): Age-related atrophy of cortical thickness and genetic effect of ANK3 gene in first episode MDD patients. *NeuroImage Clin* 28. <https://doi.org/10.1016/j.nicl.2020.102384>
39. Cheng YQ, Xu J, Chai P, Li HJ, Luo CR, Yang T, *et al.* (2010): Brain volume alteration and the correlations with the clinical characteristics in drug-naïve first-episode MDD patients: A voxel-based morphometry study. *Neurosci Lett* 480: 30–34.
40. Cui L, Wang F, Yin Z, Chang M, Song Y, Wei Y, *et al.* (2020): Effects of the LHPP gene polymorphism on the functional and structural changes of gray matter in major depressive disorder. *Quant Imaging Med Surg* 10: 257–268.
41. Dannlowski U, Kugel H, Grotegerd D, Redlich R, Suchy J, Opel N, *et al.* (2015): NCAN Cross-Disorder Risk Variant Is Associated with Limbic Gray Matter Deficits in Healthy Subjects and Major Depression.

- Neuropsychopharmacology* 40: 2510–2516.
42. Depping MS, Wolf ND, Vasic N, Sambataro F, Thomann PA, Christian Wolf R (2015): Specificity of abnormal brain volume in major depressive disorder: A comparison with borderline personality disorder. *J Affect Disord* 174: 650–657.
  43. Eijndhoven P van, van Wingen G, Katzenbauer M, Groen W, Tepest R, Fernandez G, *et al.* (2010): Paralimbic Cortical Thickness in First-Episode Depression: Evidence for Trait-Related Differences in Mood Regulation. *Am J Psychiatry* 1477–1486.
  44. Fang J, Mao N, Jiang X, Li X, Wang B, Wang Q (2015): Functional and anatomical brain abnormalities and effects of antidepressant in major depressive disorder: Combined application of voxel-based morphometry and amplitude of frequency fluctuation in resting state. *J Comput Assist Tomogr* 39: 766–773.
  45. Frodl T, Koutsouleris N, Bottlender R, Born C, Jäger M, Mörgenthaler M, *et al.* (2008): Reduced gray matter brain volumes are associated with variants of the serotonin transporter gene in major depression. *Mol Psychiatry* 13: 1093–1101.
  46. Fung G, Deng Y, Zhao Q, Li Z, Qu M, Li K, *et al.* (2015): Distinguishing bipolar and major depressive disorders by brain structural morphometry: A pilot study. *BMC Psychiatry* 15: 1–12.
  47. Gong Q, Scarpazza C, Dai J, He M, Xu X, Shi Y, *et al.* (2019): A transdiagnostic neuroanatomical signature of psychiatric illness. *Neuropsychopharmacology* 44: 869–875.
  48. Grieve SM, Korgaonkar MS, Koslow SH, Gordon E, Williams LM (2013): Widespread reductions in gray matter volume in depression. *NeuroImage Clin* 3: 332–339.
  49. Guo W, Liu F, Yu M, Zhang J, Zhang Z, Liu J, *et al.* (2014): Functional and anatomical brain deficits in drug-naïve major depressive disorder. *Prog Neuro-Psychopharmacology Biol Psychiatry* 54: 1–6.
  50. Han KM, Choi S, Jung J, Na KS, Yoon HK, Lee MS, Ham BJ (2014): Cortical thickness, cortical and subcortical volume, and white matter integrity in patients with their first episode of major depression. *J Affect Disord* 155: 42–48.
  51. Han KM, Han MR, Kim A, Kang W, Kang Y, Kang J, *et al.* (2020): A study combining whole-exome sequencing and structural neuroimaging analysis for major depressive disorder. *J Affect Disord* 262: 31–39.
  52. Harada K, Matsuo K, Nakashima M, Hobara T, Higuchi N, Higuchi F, *et al.* (2016): Disrupted orbitomedial prefrontal limbic network in individuals with later-life depression. *J Affect Disord* 204: 112–119.
  53. Harada K, Ikuta T, Nakashima M, Watanuki T, Hirotsu M, Matsubara T, *et al.* (2018): Altered connectivity of the anterior cingulate and the posterior superior temporal gyrus in a longitudinal study of later-life depression. *Front Aging Neurosci* 10: 1–11.
  54. Hellewell SC, Welton T, Maller JJ, Lyon M, Korgaonkar MS, Koslow SH, *et al.* (2019): Profound and reproducible patterns of reduced regional gray matter characterize major depressive disorder. *Transl Psychiatry* 9. <https://doi.org/10.1038/s41398-019-0512-8>
  55. Inkster B, Rao AW, Ridler K, Nichols TE, Saemann PG, Auer DP, *et al.* (2011): Structural Brain Changes in Patients with Recurrent Major Depressive Disorder Presenting with Anxiety Symptoms. *J Neuroimaging* 21: 375–382.
  56. Järnum H, Eskildsen SF, Steffensen EG, Lundbye-Christensen S, Simonsen CW, Thomsen IS, *et al.* (2011): Longitudinal MRI study of cortical thickness, perfusion, and metabolite levels in major depressive disorder. *Acta Psychiatr Scand* 124: 435–446.
  57. Jiang Y, Duan M, Chen X, Zhang X, Gong J, Dong D, *et al.* (2019): Aberrant Prefrontal-Thalamic-Cerebellar Circuit in Schizophrenia and Depression: Evidence from a Possible Causal Connectivity. *Int J Neural Syst* 29. <https://doi.org/10.1142/S0129065718500326>
  58. Johnston BA, Steele JD, Tolomeo S, Christmas D, Matthews K (2015): Structural MRI-based predictions in patients with treatment-refractory depression (TRD). *PLoS One* 10: 1–16.
  59. Jung J, Kang J, Won E, Nam K, Lee MS, Tae WS, Ham BJ (2014): Impact of lingual gyrus volume on antidepressant response and neurocognitive functions in Major Depressive Disorder: A voxel-based morphometry study. *J Affect Disord* 169: 179–187.
  60. Kakeda S, Watanabe K, Katsuki A, Sugimoto K, Igata N, Ueda I, *et al.* (2018): Relationship between interleukin (IL)-6 and brain morphology in drug-naïve, first-episode major depressive disorder using surface-based morphometry. *Sci Rep* 8: 2–10.
  61. Kandilarova S, Stoyanov D, Sirakov N, Maes M, Specht K (2019): Reduced grey matter volume in frontal and temporal areas in depression: Contributions from voxel-based morphometry study. *Acta Neuropsychiatr* 31: 252–257.
  62. Katsuki A, Kakeda S, Watanabe K, Igata R, Otsuka Y, Kishi T, *et al.* (2019): A single-nucleotide polymorphism influences brain morphology in drug-naïve patients with major depressive disorder. *Neuropsychiatr Dis Treat*

15: 2425–2432.

63. Kim MJ, Hamilton JP, Gotlib IH (2008): Reduced caudate gray matter volume in women with major depressive disorder. *Psychiatry Res - Neuroimaging* 164: 114–122.
64. Kong L, Chen K, Womer F, Jiang W, Luo X, Driesen N, *et al.* (2013): Sex differences of gray matter morphology in cortico-limbic-striatal neural system in major depressive disorder. *J Psychiatr Res* 47: 733–739.
65. Kong L, Wu F, Tang Y, Ren L, Kong D, Liu Y, *et al.* (2014): Frontal-subcortical volumetric deficits in single episode, medication-naïve depressed patients and the effects of 8 weeks fluoxetine treatment: A VBM-DARTEL study. *PLoS One* 9. <https://doi.org/10.1371/journal.pone.0079055>
66. Kumar A, Ajilore O, Zhang A, Pham D, Elderkin-Thompson V (2014): Cortical thinning in patients with late-life minor depression. *Am J Geriatr Psychiatry* 22: 459–464.
67. Lai CH, Hsu YY, Wu Y Te (2010): First episode drug-naïve major depressive disorder with panic disorder: Gray matter deficits in limbic and default network structures. *Eur Neuropsychopharmacol* 20: 676–682.
68. Lai CH, Wu Y Te (2014): Frontal-insula gray matter deficits in first-episode medication-naïve patients with major depressive disorder. *J Affect Disord* 160: 74–79.
69. Lai CH, Wu Y Te (2015): The gray matter alterations in major depressive disorder and panic disorder: Putative differences in the pathogenesis. *J Affect Disord* 186: 1–6.
70. Lai CH, Wu Y Te, Chen CY, Hou YC (2016): Gray matter increases in fronto-parietal regions of depression patients with aripiprazole monotherapy An exploratory study. *Med (United States)* 95: 2–8.
71. Lan MJ, Chhetry BT, Liston C, Mann JJ, Dubin M (2016): Transcranial Magnetic Stimulation of Left Dorsolateral Prefrontal Cortex Induces Brain Morphological Changes in Regions Associated with a Treatment Resistant Major Depressive Episode: An Exploratory Analysis. *Brain Stimul* 9: 577–583.
72. Lebedeva A, Borza T, Håberg AK, Idland AV, Dalaker TO, Aarsland D, *et al.* (2015): Neuroanatomical correlates of late-life depression and associated cognitive changes. *Neurobiol Aging* 36: 3090–3099.
73. Lee HY, Tae WS, Yoon HK, Lee BT, Paik JW, Son KR, *et al.* (2011): Demonstration of decreased gray matter concentration in the midbrain encompassing the dorsal raphe nucleus and the limbic subcortical regions in major depressive disorder: An optimized voxel-based morphometry study. *J Affect Disord* 133: 128–136.
74. Lee S, Pyun SB, Choi KW, Tae WS (2020): Shape and volumetric differences in the corpus callosum between patients with major depressive disorder and healthy controls. *Psychiatry Investig* 17: 941–950.
75. Lener MS, Kundu P, Wong E, Dewilde KE, Tang CY, Balchandani P, Murrough JW (2016): Cortical abnormalities and association with symptom dimensions across the depressive spectrum. *J Affect Disord* 190: 529–536.
76. Leung KK, Lee TMC, Wong MMC, Li LSW, Yip PSF, Khong PL (2009): Neural correlates of attention biases of people with major depressive disorder: A voxel-based morphometric study. *Psychol Med* 39: 1097–1106.
77. Li CT, Lin CP, Chou KH, Chen IY, Hsieh JC, Wu CL, *et al.* (2010): Structural and cognitive deficits in remitting and non-remitting recurrent depression: A voxel-based morphometric study. *Neuroimage* 50: 347–356.
78. Li Y, Wang C, Teng C, Jiao K, Song X, Tan Y, *et al.* (2019): Hippocampus-driving progressive structural alterations in medication-naïve major depressive disorder. *J Affect Disord* 256: 148–155.
79. Liao YL, Wang PS, Lu CF, Hung CI, Li CT, Lin CP, *et al.* (2013): Cortical Shape and Curvedness Analysis of Structural Deficits in Remitting and Non-Remitting Depression. *PLoS One* 8: 1–7.
80. Liu X, Kakeda S, Watanabe K, Yoshimura R, Abe O, Ide S, *et al.* (2015): Relationship between the cortical thickness and serum cortisol levels in drug-naïve, first-episode patients with major depressive disorder: A surface-based morphometric study. *Depress Anxiety* 32: 702–708.
81. Liu X, Hou Z, Yin Y, Xie C, Zhang H, Zhang H, *et al.* (2020): Decreased cortical thickness of left premotor cortex as a treatment predictor in major depressive disorder. *Brain Imaging Behav.* <https://doi.org/10.1007/s11682-020-00341-3>
82. Lu XW, Guo H, Sun JR, Dong QL, Zhao FT, Liao XH, *et al.* (2018): A shared effect of paroxetine treatment on gray matter volume in depressive patients with and without childhood maltreatment: A voxel-based morphometry study. *CNS Neurosci Ther* 24: 1073–1083.
83. Lu S, Xu R, Cao J, Yin Y, Gao W, Wang D, *et al.* (2019): The left dorsolateral prefrontal cortex volume is reduced in adults reporting childhood trauma independent of depression diagnosis. *J Psychiatr Res* 112: 12–17.
84. Ma C, Ding J, Li J, Guo W, Long Z, Liu F, *et al.* (2012): Resting-State Functional Connectivity Bias of Middle Temporal Gyrus and Caudate with Altered Gray Matter Volume in Major Depression. *PLoS One* 7. <https://doi.org/10.1371/journal.pone.0045263>



85. Machino A, Kunisato Y, Matsumoto T, Yoshimura S, Ueda K, Yamawaki Y, *et al.* (2014): Possible involvement of rumination in gray matter abnormalities in persistent symptoms of major depression: An exploratory magnetic resonance imaging voxel-based morphometry study. *J Affect Disord* 168: 229–235.
86. Eleonora M, Giuseppe D, Marika G, Marco G, Sara P, Carolina B, *et al.* (2019): Common and different neural markers in major depression and anxiety disorders: A pilot structural magnetic resonance imaging study. *Psychiatry Res - Neuroimaging* 290: 42–50.
87. Mak AKY, Wong MMC, Han S hui, Lee TMC (2009): Gray matter reduction associated with emotion regulation in female outpatients with major depressive disorder: A voxel-based morphometry study. *Prog Neuro-Psychopharmacology Biol Psychiatry* 33: 1184–1190.
88. Mak E, Colloby SJ, Thomas A, O'Brien JT (2016): The segregated connectome of late-life depression: a combined cortical thickness and structural covariance analysis. *Neurobiol Aging* 48: 212–221.
89. Matsubara T, Matsuo K, Harada K, Nakano M, Nakashima M, Watanuki T, *et al.* (2016): Distinct and shared endophenotypes of neural substrates in bipolar and major depressive disorders. *PLoS One* 11: 1–16.
90. Bell-McGinty S, Butters MA, Meltzer CC, Greer PJ, Reynolds CF, Becker JT (2002): Brain morphometric abnormalities in geriatric depression: Long-term neurobiological effects of illness duration. *Am J Psychiatry* 159: 1424–1427.
91. Meng Q, Zhang A, Cao X, Sun N, Li X, Zhang Y, Wang Y (2020): Brain imaging study on the pathogenesis of depression & therapeutic effect of selective serotonin reuptake inhibitors. *Psychiatry Investig* 17: 688–694.
92. Mwangi B, Ebmeier KP, Matthews K, Douglas Steele J (2012): Multi-centre diagnostic classification of individual structural neuroimaging scans from patients with major depressive disorder. *Brain* 135: 1508–1521.
93. Na KS, Chang HS, Won E, Han KM, Choi S, Tae WS, *et al.* (2014): Association between glucocorticoid receptor methylation and hippocampal subfields in major depressive disorder. *PLoS One* 9: 1–9.
94. Na KS, Won E, Kang J, Chang HS, Yoon HK, Tae WS, *et al.* (2016): Brain-derived neurotrophic factor promoter methylation and cortical thickness in recurrent major depressive disorder. *Sci Rep* 6: 1–10.
95. Nakano M, Matsuo K, Nakashima M, Matsubara T, Harada K, Egashira K, *et al.* (2014): Gray matter volume and rapid decision-making in major depressive disorder. *Prog Neuro-Psychopharmacology Biol Psychiatry* 48: 51–56.
96. Nan D, Yuqi C, Zonglin S, Chenglong D, Na L, Fang L, *et al.* (2020): Association of a SIRT1 polymorphism with changes of gray matter volume in patients with first-episode medication-naïve major depression. *Psychiatry Res - Neuroimaging* 301: 1–7.
97. Niu M, Wang Y, Jia Y, Wang J, Zhong S, Lin J, *et al.* (2017): Common and Specific Abnormalities in Cortical Thickness in Patients with Major Depressive and Bipolar Disorders. *EBioMedicine* 16: 162–171.
98. Opel N, Zwanzger P, Redlich R, Grotegerd D, Dohm K, Arolt V, *et al.* (2016): Differing brain structural correlates of familial and environmental risk for major depressive disorder revealed by a combined VBM/pattern recognition approach. *Psychol Med* 46: 277–290.
99. Opel N, Cearns M, Clark S, Toben C, Grotegerd D, Heindel W, *et al.* (2019): Large-scale evidence for an association between low-grade peripheral inflammation and brain structural alterations in major depression in the bidirect study. *J Psychiatry Neurosci* 44: 423–431.
100. Ozalay O, Aksoy B, Tunay S, Simsek F, Chandhoki S, Kitis O, *et al.* (2016): Cortical thickness and VBM in young women at risk for familial depression and their depressed mothers with positive family history. *Psychiatry Res - Neuroimaging* 252: 1–9.
101. Peng H, Wu K, Li J, Qi H, Guo S, Chi M, *et al.* (2014): Increased suicide attempts in young depressed patients with abnormal temporal-parietal-limbic gray matter volume. *J Affect Disord* 165: 69–73.
102. Peng J, Liu J, Nie B, Li Y, Shan B, Wang G, Li K (2011): Cerebral and cerebellar gray matter reduction in first-episode patients with major depressive disorder: A voxel-based morphometry study. *Eur J Radiol* 80: 395–399.
103. Peng D, Shi F, Li G, Fralick D, Shen T, Qiu M, *et al.* (2015): Surface vulnerability of cerebral cortex to major depressive disorder. *PLoS One* 10: 1–16.
104. De Azevedo-Marques Périco C, Duran FLS, Zanetti M V., Santos LC, Murray RM, Scazufca M, *et al.* (2011): A population-based morphometric MRI study in patients with first-episode psychotic bipolar disorder: Comparison with geographically matched healthy controls and major depressive disorder subjects. *Bipolar Disord* 13: 28–40.
105. Qi H, Ning Y, Li J, Guo S, Chi M, Gao M, *et al.* (2014): Gray matter volume abnormalities in depressive patients with and without anxiety disorders. *Med (United States)* 93: e345.
106. Qiu L, Lui S, Kuang W, Huang X, Li J, Li J, *et al.* (2014): Regional increases of cortical thickness in untreated, first-episode major depressive disorder. *Transl Psychiatry* 4. <https://doi.org/10.1038/tp.2014.18>

107. Qiu H, Li X, Zhao W, Du L, Huang P, Fu Y, *et al.* (2016): Electroconvulsive therapy-induced brain structural and functional changes in major depressive disorders: A longitudinal study. *Med Sci Monit* 22: 4577–4586.
108. Radoman M, Hoepfner SS, Schuster RM, Evins AE, Gilman JM (2019): Marijuana use and major depressive disorder are additively associated with reduced verbal learning and altered cortical thickness. *Cogn Affect Behav Neurosci* 19: 1047–1058.
109. Ribeiz SRI, Duran F, Oliveira MC, Bezerra D, Castro CC, Steffens DC, *et al.* (2013): Structural brain changes as biomarkers and outcome predictors in patients with late-life depression: A cross-sectional and prospective study. *PLoS One* 8: 1–8.
110. Rodríguez-Cano E, Sarró S, Monté GC, Maristany T, Salvador R, McKenna PJ, Pomarol-Clotet E (2014): Evidence for structural and functional abnormality in the subgenual anterior cingulate cortex in major depressive disorder. *Psychol Med* 44: 3263–3273.
111. Salvadore G, Nugent AC, Lemaitre H, Luckenbaugh DA, Tinsley R, Cannon DM, *et al.* (2011): Prefrontal cortical abnormalities in currently depressed versus currently remitted patients with major depressive disorder. *Neuroimage* 54: 2643–2651.
112. Sandu AL, Artiges E, Galinowski A, Gallarda T, Bellivier F, Lemaitre H, *et al.* (2017): Amygdala and regional volumes in treatment-resistant versus nontreatment-resistant depression patients. *Depress Anxiety* 34: 1065–1071.
113. Scheinost D, Holmes SE, Dellagioia N, Schleifer C, Matuskey D, Abdallah CG, *et al.* (2018): Multimodal Investigation of Network Level Effects Using Intrinsic Functional Connectivity, Anatomical Covariance, and Structure-to-Function Correlations in Unmedicated Major Depressive Disorder. *Neuropsychopharmacology* 43: 1119–1127.
114. Scheuerecker J, Meisenzahl EM, Koutsouleris N, Roesner M, Med C, Schöpf V, *et al.* (2010): Orbitofrontal volume reductions during emotion recognition in patients with major depression. *J Psychiatry Neurosci* 35: 311–320.
115. Serra-Blasco M, Portella MJ, Gómez-Ansón B, De Diego-Adelinõ J, Vives-Gilabert Y, Puigdemont D, *et al.* (2013): Effects of illness duration and treatment resistance on grey matter abnormalities in major depression. *Br J Psychiatry* 202: 434–440.
116. Shah PJ, Ebmeier KP, Glabus MF, Goodwin GM (1998): Cortical grey matter reductions associated with treatment-resistant chronic unipolar depression: Controlled magnetic resonance imaging study. *Br J Psychiatry* 172: 527–332.
117. Shah PJ, Glabus MF, Goodwin GM, Ebmeier KP (2002): Chronic, treatment-resistant depression and right fronto-striatal atrophy. *Br J Psychiatry* 180: 434–440.
118. Shen Z, Cheng Y, Yang S, Dai N, Ye J, Liu X, *et al.* (2016): Changes of grey matter volume in first-episode drug-naïve adult major depressive disorder patients with different age-onset. *NeuroImage Clin* 12: 492–498.
119. Shen Z, Jiang H, Cheng Y, Ye J, Lu Y, Zhou C, *et al.* (2019): Association of cortical thickness with age of onset in first-episode, drug-naïve major depression. *Neuroreport* 30: 1074–1080.
120. Shen Z, Lu Y, Jiang H, Ye J, Zhou C, He M, *et al.* (2020): Brain-derived neurotrophic factor Val66Met polymorphism affects cortical thickness of rostral anterior cingulate in patients with major depressive disorder. *Neuroreport* 1146–1153.
121. Soriano-Mas C, Hernández-Ribas R, Pujol J, Urretavizcaya M, Deus J, Harrison BJ, *et al.* (2011): Cross-sectional and longitudinal assessment of structural brain alterations in melancholic depression. *Biol Psychiatry* 69: 318–325.
122. Späti J, Hänggi J, Doerig N, Ernst J, Sambataro F, Brakowski J, *et al.* (2015): Prefrontal thinning affects functional connectivity and regional homogeneity of the anterior cingulate cortex in depression. *Neuropsychopharmacology* 40: 1640–1648.
123. Sprengelmeyer R, Steele JD, Mwangi B, Kumar P, Christmas D, Milders M, Matthews K (2011): The insular cortex and the neuroanatomy of major depression. *J Affect Disord* 133: 120–127.
124. Stratmann M, Konrad C, Kugel H, Krug A, Schöning S, Ohrmann P, *et al.* (2014): Insular and hippocampal gray matter volume reductions in patients with major depressive disorder. *PLoS One* 9. <https://doi.org/10.1371/journal.pone.0102692>
125. Suh JS, Minuzzi L, Raamana PR, Davis A, Hall GB, Harris J, *et al.* (2020): An investigation of cortical thickness and antidepressant response in major depressive disorder: A CAN-BIND study report. *NeuroImage Clin* 25. <https://doi.org/10.1016/j.nicl.2020.102178>
126. Tae W-S (2015): Regional Gray Matter Volume Reduction Associated with Major Depressive Disorder: A Voxel-Based Morphometry. *Investig Magn Reson Imaging* 19: 10.
127. Tang Y, Wang F, Xie G, Liu J, Li L, Su L, *et al.* (2007): Reduced ventral anterior cingulate and amygdala

- volumes in medication-naïve females with major depressive disorder: A voxel-based morphometric magnetic resonance imaging study. *Psychiatry Res - Neuroimaging* 156: 83–86.
128. Treadway MT, Grant MM, Ding Z, Hollon SD, Gore JC, Shelton RC (2009): Early adverse events, HPA activity and rostral anterior cingulate volume in MDD. *PLoS One* 4. <https://doi.org/10.1371/journal.pone.0004887>
  129. Treadway MT, Waskom ML, Dillon DG, Holmes AJ, Park MTM, Chakravarty MM, *et al.* (2015): Illness progression, recent stress, and morphometry of hippocampal subfields and medial prefrontal cortex in major depression. *Biol Psychiatry* 77: 285–294.
  130. Tu PC, Chen LF, Hsieh JC, Bai YM, Li CT, Su TP (2012): Regional cortical thinning in patients with major depressive disorder: A surface-based morphometry study. *Psychiatry Res - Neuroimaging* 202: 206–213.
  131. Ueda I, Kakeda S, Watanabe K, Yoshimura R, Kishi T, Abe O, *et al.* (2016): Relationship between G1287A of the net gene polymorphisms and brain volume in major depressive disorder: A voxel-based MRI study. *PLoS One* 11: 1–12.
  132. Van Tol MJ, Van Der Wee NJA, Van Den Heuvel OA, Nielen MMA, Demenescu LR, Aleman A, *et al.* (2010): Regional brain volume in depression and anxiety disorders. *Arch Gen Psychiatry* 67: 1002–1011.
  133. Van Tol MJ, Li M, Metzger CD, Hailla N, Horn DI, Li W, *et al.* (2014): Local cortical thinning links to resting-state disconnectivity in major depressive disorder. *Psychol Med* 44: 2053–2065.
  134. Vasic N, Walter H, Höse A, Wolf RC (2008): Gray matter reduction associated with psychopathology and cognitive dysfunction in unipolar depression: A voxel-based morphometry study. *J Affect Disord* 109: 107–116.
  135. Vasic N, Wolf ND, Grön G, Sasic-Vasic Z, Connemann BJ, Sambataro F, *et al.* (2015): Baseline brain perfusion and brain structure in patients with major depression: A multimodal magnetic resonance imaging study. *J Psychiatry Neurosci* 40: 412–421.
  136. Wagner G, Koch K, Schachtzabel C, Schultz CC, Sauer H, Schlösser RG (2011): Structural brain alterations in patients with major depressive disorder and high risk for suicide: Evidence for a distinct neurobiological entity? *Neuroimage* 54: 1607–1614.
  137. Wagner G, Koch K, Schachtzabel C, Reichenbach JR, Sauer H, Schlösser RGM (2008): Enhanced rostral anterior cingulate cortex activation during cognitive control is related to orbitofrontal volume reduction in unipolar depression. *J Psychiatry Neurosci* 33: 199–208.
  138. Watanabe K, Kakeda S, Yoshimura R, Abe O, Ide S, Hayashi K, *et al.* (2015): Relationship between the catechol-O-methyl transferase Val108/158Met genotype and brain volume in treatment-naïve major depressive disorder: Voxel-based morphometry analysis. *Psychiatry Res - Neuroimaging* 233: 481–487.
  139. Wolf RC, Nolte HM, Hirjak D, Hofer S, Seidl U, Depping MS, *et al.* (2016): Structural network changes in patients with major depression and schizophrenia treated with electroconvulsive therapy. *Eur Neuropsychopharmacol* 26: 1465–1474.
  140. Xie C, Li W, Chen G, Douglas Ward B, Franczak MB, Jones JL, *et al.* (2012): The co-existence of geriatric depression and amnesic mild cognitive impairment detrimentally affect gray matter volumes: Voxel-based morphometry study. *Behav Brain Res* 235: 244–250.
  141. Xiong G, Dong D, Cheng C, Jiang Y, Sun X, He J, *et al.* (2019): State-independent and -dependent structural alterations in limbic-cortical regions in patients with current and remitted depression. *J Affect Disord* 258: 1–10.
  142. Xu H, Zhao T, Luo F, Zheng Y (2019): Dissociative changes in gray matter volume following electroconvulsive therapy in major depressive disorder: a longitudinal structural magnetic resonance imaging study. *Neuroradiology* 61: 1297–1308.
  143. Yang X, Ma X, Huang B, Sun G, Zhao L, Lin D, *et al.* (2015): Gray matter volume abnormalities were associated with sustained attention in unmedicated major depression. *Compr Psychiatry* 63: 71–79.
  144. Yang X hua, Wang Y, Huang J, Zhu C ying, Liu X qun, Cheung EFC, *et al.* (2015): Increased prefrontal and parietal cortical thickness does not correlate with anhedonia in patients with untreated first-episode major depressive disorders. *Psychiatry Res - Neuroimaging* 234: 144–151.
  145. Yang Y, Feng L, Imamura K, Hu B (2015): Morphologic and Functional Connectivity Alterations in Patients with Major Depressive Disorder\*. *9250*: 275–284.
  146. Yang S, Cheng Y, Mo Y, Bai Y, Shen Z, Liu F, *et al.* (2017): Childhood maltreatment is associated with gray matter volume abnormalities in patients with first-episode depression. *Psychiatry Res - Neuroimaging* 268: 27–34.
  147. Yang J, Yin Y, Svob C, Long J, He X, Zhang Y, *et al.* (2017): Amygdala atrophy and its functional disconnection with the cortico-striatal-pallidal-thalamic circuit in major depressive disorder in females. *PLoS*

One 12: 1–13.

148. Yang Y, Chattun MR, Yan R, Zhao K, Chen Y, Zhu R, *et al.* (2020): Atrophy of right inferior frontal orbital gyrus and frontoparietal functional connectivity abnormality in depressed suicide attempters. *Brain Imaging Behav.* <https://doi.org/10.1007/s11682-019-00206-4>
149. Ye J, Shen Z, Xu X, Yang S, Chen W, Liu X, *et al.* (2017): Abnormal functional connectivity of the amygdala in first-episode and untreated adult major depressive disorder patients with different ages of onset. *Neuroreport* 28: 214–221.
150. Zaremba D, Dohm K, Redlich R, Grotegerd D, Strojny R, Meinert S, *et al.* (2018): Association of brain cortical changes with relapse in patients with major depressive disorder. *JAMA Psychiatry* 75: 484–492.
151. Zhang TJ, Wu QZ, Huang XQ, Sun XL, Zou K, Lui S, *et al.* (2009): Magnetization transfer imaging reveals the brain deficit in patients with treatment-refractory depression. *J Affect Disord* 117: 157–161.
152. Zhang R, Wei S, Chang M, Jiang X, Tang Y, Wang F (2020): Dorsolateral and Ventrolateral Prefrontal Cortex Structural Changes relative to Suicidal Ideation in Patients with Depression. *Acta Neuropsychiatr* 32: 84–91.
153. Zhang T, Zhao B, Shi C, Nie B, Liu H, Yang X, *et al.* (2020): Subthreshold depression may exist on a spectrum with major depressive disorder: Evidence from gray matter volume and morphological brain network. *J Affect Disord* 266: 243–251.
154. Zhao K, Liu H, Yan R, Hua L, Chen Y, Shi J, *et al.* (2017): Cortical thickness and subcortical structure volume abnormalities in patients with major depression with and without anxious symptoms. *Brain Behav* 7: 1–9.
155. Zhao K, Liu H, Yan R, Hua L, Chen Y, Shi J, *et al.* (2017): Altered patterns of association between cortical thickness and subcortical volume in patients with first episode major depressive disorder: A structural MRI study. *Psychiatry Res - Neuroimaging* 260: 16–22.
156. Zhou R, Wang F, Zhao G, Xia W, Peng D, Mao R, *et al.* (2018): Effects of tumor necrosis factor- $\alpha$  polymorphism on the brain structural changes of the patients with major depressive disorder. *Transl Psychiatry* 8. <https://doi.org/10.1038/s41398-018-0256-x>
157. Zhuo C, Zhu J, Wang C, Qu H, Ma X, Qin W (2017): Different spatial patterns of brain atrophy and global functional connectivity impairments in major depressive disorder. *Brain Imaging Behav* 11: 1678–1689.
158. Zou K, Deng W, Li T, Zhang B, Jiang L, Huang C, *et al.* (2010): Changes of Brain Morphometry in First-Episode, Drug-Naïve, Non-Late-Life Adult Patients with Major Depression: An Optimized Voxel-Based Morphometry Study. *Biol Psychiatry* 67: 186–188.
159. Zuo Z, Ran S, Wang Y, Li C, Han Q, Tang Q, *et al.* (2018): Altered structural covariance among the dorsolateral prefrontal cortex and amygdala in treatment-Naïve patients with major depressive disorder. *Front Psychiatry* 9: 1–10.
160. Kaiser RH, Andrews-Hanna JR, Wager TD, Pizzagalli DA (2015): Large-scale network dysfunction in Major Depressive Disorder: Meta-analysis of resting-state functional connectivity. *JAMA Psychiatry* 72: 603–611.
161. Glover GH (2011): Overview of functional magnetic resonance imaging. *Neurosurg Clin N Am* 22: 133–139.
162. Weiskopf N, Hutton C, Josephs O, Turner R, Deichmann R (2007): Optimized EPI for fMRI studies of the orbitofrontal cortex: Compensation of susceptibility-induced gradients in the readout direction. *Magn Reson Mater Physics, Biol Med* 20: 39–49.
163. Olman CA, Davachi L, Inati S (2009): Distortion and signal loss in medial temporal lobe. *PLoS One* 4. <https://doi.org/10.1371/journal.pone.0008160>
164. Kempton MJ (2011): Structural Neuroimaging Studies in Major Depressive Disorder. *Arch Gen Psychiatry* 68: 675.
165. Janssen J, Hulshoff Pol HE, Lampe IK, Schnack HG, De Leeuw FE, Kahn RS, Heeren TJ (2004): Hippocampal changes and white matter lesions in early-onset depression. *Biol Psychiatry* 56: 825–831.
166. Janssen J, Hulshoff Pol HE, De Leeuw FE, Schnack HG, Lampe IK, Kok RM, *et al.* (2007): Hippocampal volume and subcortical white matter lesions in late life depression: Comparison of early and late onset depression. *J Neurol Neurosurg Psychiatry* 78: 638–640.
167. Kumar A, Jin Z, Bilker W, Udupa J, Gottlieb G (1998): Late-onset minor and major depression: Early evidence for common neuroanatomical substrates detected by using MRI. *Proc Natl Acad Sci U S A* 95: 7654–7658.
168. Almeida OP, Burton EJ, Ferrier N, McKeith IG, O'Brien JT (2003): Depression with late onset is associated with right frontal lobe atrophy. *Psychol Med* 33: 675–681.
169. Herrmann LL, Le Masurier M, Ebmeier KP (2008): White matter hyperintensities in late life depression: A systematic review. *J Neurol Neurosurg Psychiatry* 79: 619–624.
170. Rapp MA, Dahlman K, Sano M, Grossman HT, Haroutunian V, Gorman JM (2005): Neuropsychological Differences Between Late-Onset and Recurrent Geriatric Major Depression. *Am J Psychiatry* 162: 691–698.
171. Alexopoulos GS (2019): Mechanisms and treatment of late-life depression. *Transl Psychiatry* 9.

<https://doi.org/10.1038/s41398-019-0514-6>

172. Diniz BS, Butters MA, Albert SM, Dew MA, Reynolds CF (2013): Late-life depression and risk of vascular dementia and Alzheimer's disease: Systematic review and meta-analysis of community-based cohort studies. *Br J Psychiatry* 202: 329–335.
173. Dusi N, Barlati S, Vita A, Brambilla P (2015): Brain Structural Effects of Antidepressant Treatment in Major Depression. *Curr Neuropharmacol* 13: 458–465.
174. Willard SL, Uberseder B, Clark A, Daunais JB, Johnston WD, Neely D, *et al.* (2015): Long term sertraline effects on neural structures in depressed and nondepressed adult female nonhuman primates. *Neuropharmacology* 99: 369–378.
175. Taupin P (2006): Neurogenesis and the Effect of Antidepressants. *Drug Target Insights* 1: 117739280600100.
